# Supplementary material
Source: publisher figshare collection journal article supplement (https://frontiersin.figshare.com/ndownloader/files/23235785)
Supplement: Supplementary file 1 [file 23235785]

## Sheet: AntSpo_EMP_blast
File S1. Local blast results of the microbiome OTUs from Dendrilla antarctica, Sphaerotylus antarcticus, Mycale acerata, Hemigellius pilosus and seawater against the Sponge Earth Microbiome Project database. First hit, alignment matches and sequence identities are shown. Percentage of microbiome OTUs above identity thresholds is also shown. Sponge core OTUs are represented in bold and variable OT…
Local blast of the microbiome OTUs against the Sponge Earth Microbiome Project (sEMP) database
Microbiome (OTU and number of total reads)	First sEMP hit (OTU)	Alignment matches	Identities		Percentage of OTUs above Identity thresholds
Otu00001_722039	Otu0168643	98/100	0.98		>=97%	%	>=95% <97%	%	>=90% <95%	%	>=80% <90%	%	Total_Blast	%	Total_nohit	%
Otu00002_368315	Otu0013567	99/100	0.99		9782	87.4408	923	8.25065	421	3.7633	40	0.357558	11166	99.8123	21	0.187718
Otu00003_313090	Otu0000005	100/100	1
Otu00004_302348	Otu0127466	99/100	0.99
Otu00005_207396	Otu0000797	100/100	1
Otu00006_204276	Otu0340792	98/100	0.98
Otu00007_203213	Otu0199475	99/100	0.99
Otu00008_167706	Otu0007983	100/100	1				Host-associated from First sEMP hit core OTUs: http://www.spongeemp.com
Otu00009_147438	Otu0110988	99/100	0.99
Otu00010_139730	Otu0000041	100/100	1
Otu00011_113524	Otu0391500	99/100	0.99
Otu00012_95544	Otu0013567	99/100	0.99
Otu00013_94130	Otu0110988	98/100	0.98
Otu00014_90946	Otu0251300	97/98	0.99
Otu00015_65533	Otu0000122	100/100	1
Otu00016_59177	Otu0283341	99/100	0.99
Otu00017_56380	Otu0377869	98/100	0.98
Otu00018_52144	Otu0001353	100/100	1
Otu00019_50137	Otu0359997	98/100	0.98
Otu00020_48116	Otu0000285	100/100	1
Otu00021_47222	Otu0000481	100/100	1
Otu00022_40661	Otu0194724	98/99	0.99
Otu00023_32356	Otu0018578	99/100	0.99
Otu00024_25609	Otu0110356	99/100	0.99
Otu00025_24858	Otu0212688	99/100	0.99
Otu00026_21955	Otu0124104	99/100	0.99
Otu00027_21347	Otu0268075	99/100	0.99				Habitats from First sEMP hit core OTUs: http://www.spongeemp.com
Otu00028_20704	Otu0162629	99/100	0.99
Otu00029_20388	Otu0069941	98/98	1
Otu00030_19717	Otu0201677	99/100	0.99
Otu00031_19684	Otu0422882	98/100	0.98
Otu00032_17465	Otu0313672	93/97	0.96
Otu00033_17259	Otu0383882	96/100	0.96
Otu00034_15786	Otu0134014	99/100	0.99
Otu00035_14390	Otu0242573	98/99	0.99
Otu00036_12411	Otu0412866	98/100	0.98
Otu00037_10731	Otu0009742	99/100	0.99
Otu00038_10472	Otu0030740	98/100	0.98
Otu00039_10188	Otu0169418	97/100	0.97
Otu00040_9042	Otu0169125	99/100	0.99
Otu00041_8790	Otu0141520	96/97	0.99
Otu00042_8740	Otu0027188	99/100	0.99
Otu00043_8104	Otu0025921	99/99	1
Otu00044_7785	Otu0000070	100/100	1
Otu00045_7661	Otu0007686	98/100	0.98
Otu00046_7405	Otu0026101	99/100	0.99
Otu00047_6984	Otu0352891	96/96	1
Otu00048_6002	Otu0022927	99/100	0.99
Otu00049_5927	Otu0327211	99/100	0.99
Otu00050_5826	Otu0000136	100/100	1
Otu00051_5815	Otu0000001	100/100	1
Otu00052_5798	Otu0104834	99/100	0.99
Otu00053_5753	Otu0341638	98/99	0.99
Otu00054_5497	Otu0096412	99/100	0.99
Otu00055_5172	Otu0040530	98/98	1
Otu00056_5166	Otu0013567	99/100	0.99
Otu00057_4873	Otu0021933	99/100	0.99
Otu00058_4619	Otu0013556	95/100	0.95
Otu00059_4599	Otu0000279	100/100	1
Otu00060_4580	Otu0121594	99/100	0.99
Otu00061_4238	Otu0234243	99/100	0.99
Otu00062_3968	Otu0513005	99/100	0.99
Otu00063_3896	Otu0109554	99/100	0.99
Otu00064_3892	Otu0003080	100/100	1
Otu00065_3804	Otu0233420	92/100	0.92
Otu00066_3774	Otu0269381	98/100	0.98
Otu00067_3767	Otu0199475	99/100	0.99
Otu00068_3737	Otu0014862	99/100	0.99
Otu00069_3602	Otu0357864	99/100	0.99
Otu00070_3199	Otu0060863	99/100	0.99
Otu00071_3078	Otu0075951	99/100	0.99
Otu00072_2976	Otu0411787	98/100	0.98
Otu00073_2895	Otu0011758	99/100	0.99
Otu00074_2876	Otu0340792	97/100	0.97
Otu00075_2857	Otu0340935	93/100	0.93
Otu00076_2823	Otu0377085	99/100	0.99
Otu00077_2813	Otu0011335	96/100	0.96
Otu00078_2761	Otu0003532	99/100	0.99
Otu00079_2650	Otu0000881	97/99	0.98
Otu00080_2606	Otu0039508	98/100	0.98
Otu00081_2564	Otu0350897	97/98	0.99
Otu00082_2405	Otu0001531	100/100	1
Otu00083_2319	Otu0030473	100/100	1
Otu00084_2316	Otu0041074	99/100	0.99
Otu00085_2236	Otu0081136	99/100	0.99
Otu00086_2164	Otu0069550	98/100	0.98
Otu00087_2133	Otu0127466	99/100	0.99
Otu00088_1994	Otu0410594	95/97	0.98
Otu00089_1917	Otu0239978	100/100	1
Otu00090_1817	Otu0357875	99/100	0.99
Otu00091_1810	Otu0007716	100/100	1
Otu00092_1779	Otu0005971	98/100	0.98
Otu00093_1753	Otu0056261	98/100	0.98
Otu00094_1751	Otu0357972	97/100	0.97
Otu00095_1749	Otu0106090	99/100	0.99
Otu00096_1734	Otu0137996	94/97	0.97
Otu00097_1717	Otu0421931	99/100	0.99
Otu00098_1712	Otu0101187	99/100	0.99
Otu00099_1693	Otu0065949	95/99	0.96
Otu00100_1647	Otu0000005	100/100	1
Otu00101_1645	Otu0000490	100/100	1
Otu00102_1640	Otu0277374	98/100	0.98
Otu00103_1626	Otu0003891	100/100	1
Otu00104_1623	Otu0207856	99/100	0.99
Otu00105_1622	Otu0176831	96/97	0.99
Otu00106_1610	Otu0483096	98/100	0.98
Otu00107_1601	Otu0036604	99/100	0.99
Otu00108_1594	Otu0023155	99/100	0.99
Otu00109_1528	Otu0358345	99/100	0.99
Otu00110_1493	Otu0225412	99/100	0.99
Otu00111_1490	Otu0124765	95/95	1
Otu00112_1478	Otu0196535	97/100	0.97
Otu00113_1473	Otu0235135	97/97	1
Otu00114_1445	Otu0283341	99/100	0.99
Otu00115_1430	Otu0008981	99/100	0.99
Otu00116_1429	Otu0243816	97/100	0.97
Otu00117_1410	Otu0001487	100/100	1
Otu00118_1404	Otu0168643	98/100	0.98
Otu00119_1393	Otu0002050	100/100	1
Otu00120_1350	Otu0065499	99/100	0.99
Otu00121_1296	Otu0114019	97/97	1
Otu00122_1294	Otu0007983	100/100	1
Otu00123_1289	Otu0156349	99/100	0.99
Otu00124_1270	Otu0008042	100/100	1
Otu00125_1175	Otu0003924	99/99	1
Otu00126_1174	Otu0000127	100/100	1
Otu00127_1173	Otu0473137	90/99	0.91
Otu00128_1172	Otu0004738	99/100	0.99
Otu00129_1168	Otu0223444	98/99	0.99
Otu00130_1163	Otu0286783	98/100	0.98
Otu00131_1158	Otu0075240	97/97	1
Otu00132_1156	Otu0327202	97/98	0.99
Otu00133_1151	Otu0055435	91/96	0.95
Otu00134_1103	Otu0217597	97/97	1
Otu00135_1061	Otu0000236	100/100	1
Otu00136_1041	Otu0261390	97/98	0.99
Otu00137_1041	Otu0015792	99/100	0.99
Otu00138_998	Otu0270978	98/100	0.98
Otu00139_986	Otu0385064	95/95	1
Otu00140_984	Otu0003514	100/100	1
Otu00141_902	Otu0210145	99/100	0.99
Otu00142_900	Otu0033441	98/100	0.98
Otu00143_880	Otu0349018	99/100	0.99
Otu00144_867	Otu0209940	97/97	1
Otu00145_835	Otu0414922	98/100	0.98
Otu00146_831	Otu0279871	98/100	0.98
Otu00147_818	Otu0004831	99/100	0.99
Otu00148_813	Otu0192477	99/100	0.99
Otu00149_791	Otu0000749	100/100	1
Otu00150_768	Otu0210632	97/100	0.97
Otu00151_758	Otu0276145	99/100	0.99
Otu00152_757	Otu0025411	96/98	0.98
Otu00153_750	Otu0447346	99/100	0.99
Otu00154_743	Otu0417364	98/100	0.98
Otu00155_723	Otu0004675	97/98	0.99
Otu00156_719	Otu0286708	99/100	0.99
Otu00157_708	Otu0467974	73/80	0.91
Otu00158_699	Otu0000510	100/100	1
Otu00159_696	Otu0374047	99/100	0.99
Otu00160_693	Otu0264178	95/95	1
Otu00161_685	Otu0127466	99/100	0.99
Otu00162_664	Otu0017839	99/100	0.99
Otu00163_658	Otu0143397	95/99	0.96
Otu00164_646	Otu0001519	99/99	1
Otu00165_645	Otu0134014	99/100	0.99
Otu00166_642	Otu0167601	99/100	0.99
Otu00167_638	Otu0007183	100/100	1
Otu00168_636	Otu0122412	99/100	0.99
Otu00169_635	Otu0030051	98/100	0.98
Otu00170_625	Otu0251300	97/98	0.99
Otu00171_620	Otu0015940	100/100	1
Otu00172_618	Otu0371689	99/100	0.99
Otu00173_585	Otu0453046	89/97	0.92
Otu00174_582	Otu0476253	99/100	0.99
Otu00175_575	Otu0003488	100/100	1
Otu00176_573	Otu0035972	99/100	0.99
Otu00177_569	Otu0194247	97/99	0.98
Otu00178_565	Otu0168643	99/100	0.99
Otu00179_564	Otu0348585	99/100	0.99
Otu00180_560	Otu0007674	99/100	0.99
Otu00181_549	Otu0300944	96/96	1
Otu00182_543	Otu0001958	100/100	1
Otu00183_536	Otu0056660	96/97	0.99
Otu00184_532	Otu0377869	98/100	0.98
Otu00185_530	Otu0095852	99/100	0.99
Otu00186_523	Otu0270978	98/100	0.98
Otu00187_516	Otu0000481	100/100	1
Otu00188_516	Otu0228777	99/100	0.99
Otu00189_514	Otu0008698	100/100	1
Otu00190_510	Otu0429055	99/100	0.99
Otu00191_509	Otu0233028	98/100	0.98
Otu00192_509	Otu0112550	99/100	0.99
Otu00193_507	Otu0009742	98/100	0.98
Otu00194_504	Otu0157270	99/100	0.99
Otu00195_501	Otu0149953	98/99	0.99
Otu00196_500	Otu0043761	100/100	1
Otu00197_496	Otu0487372	98/100	0.98
Otu00198_493	Otu0194599	96/100	0.96
Otu00199_492	Otu0193396	97/100	0.97
Otu00200_491	Otu0008637	96/98	0.98
Otu00201_490	Otu0359997	98/100	0.98
Otu00202_490	Otu0019611	100/100	1
Otu00203_488	Otu0004568	100/100	1
Otu00204_483	Otu0000161	99/99	1
Otu00205_477	Otu0227662	98/99	0.99
Otu00206_470	Otu0073623	100/100	1
Otu00207_469	Otu0229835	97/100	0.97
Otu00208_464	Otu0013567	99/100	0.99
Otu00209_461	Otu0013567	99/100	0.99
Otu00210_457	Otu0176831	96/97	0.99
Otu00211_457	Otu0501369	96/100	0.96
Otu00212_454	Otu0022452	100/100	1
Otu00213_450	Otu0157343	98/100	0.98
Otu00214_449	Otu0018860	99/100	0.99
Otu00215_449	Otu0000797	100/100	1
Otu00216_449	Otu0455932	88/95	0.93
Otu00217_449	Otu0335576	98/98	1
Otu00218_441	Otu0143408	97/99	0.98
Otu00219_432	Otu0251300	99/100	0.99
Otu00220_428	Otu0174447	94/100	0.94
Otu00222_423	Otu0006572	100/100	1
Otu00223_415	Otu0239978	95/100	0.95
Otu00224_411	Otu0176831	96/97	0.99
Otu00225_411	Otu0447365	98/100	0.98
Otu00226_410	Otu0375846	99/100	0.99
Otu00227_403	Otu0001549	100/100	1
Otu00228_403	Otu0001352	100/100	1
Otu00229_399	Otu0144823	95/97	0.98
Otu00230_399	Otu0490434	98/100	0.98
Otu00231_383	Otu0270978	98/100	0.98
Otu00232_380	Otu0136304	87/96	0.91
Otu00233_380	Otu0000461	100/100	1
Otu00234_375	Otu0029000	99/100	0.99
Otu00235_368	Otu0127466	99/100	0.99
Otu00236_362	Otu0013567	99/100	0.99
Otu00237_359	Otu0000236	100/100	1
Otu00238_353	Otu0340792	96/98	0.98
Otu00239_347	Otu0201362	97/98	0.99
Otu00240_346	Otu0386215	96/100	0.96
Otu00241_346	Otu0000041	100/100	1
Otu00242_345	Otu0113770	66/76	0.87
Otu00243_340	Otu0029714	99/99	1
Otu00244_336	Otu0007954	100/100	1
Otu00245_334	Otu0116946	99/100	0.99
Otu00246_332	Otu0507703	94/97	0.97
Otu00247_330	Otu0277374	98/100	0.98
Otu00248_330	Otu0149105	96/100	0.96
Otu00249_330	Otu0176621	99/100	0.99
Otu00250_328	Otu0270978	98/100	0.98
Otu00251_328	Otu0000842	98/98	1
Otu00252_328	Otu0233028	98/100	0.98
Otu00253_324	Otu0000005	100/100	1
Otu00254_318	Otu0348357	99/100	0.99
Otu00255_307	Otu0077841	98/100	0.98
Otu00256_305	Otu0269808	97/100	0.97
Otu00257_305	Otu0341638	98/99	0.99
Otu00258_300	Otu0168643	98/100	0.98
Otu00259_299	Otu0000797	100/100	1
Otu00260_296	Otu0233028	98/100	0.98
Otu00261_295	Otu0110988	98/100	0.98
Otu00262_292	Otu0001012	100/100	1
Otu00263_291	Otu0008025	99/100	0.99
Otu00264_287	Otu0008905	98/100	0.98
Otu00265_286	Otu0463984	98/98	1
Otu00266_286	Otu0013567	99/100	0.99
Otu00267_285	Otu0142796	94/102	0.92
Otu00268_283	Otu0199475	99/100	0.99
Otu00269_280	Otu0185540	98/100	0.98
Otu00270_278	Otu0217405	95/95	1
Otu00271_277	Otu0251300	97/98	0.99
Otu00272_277	Otu0016500	96/100	0.96
Otu00273_275	Otu0075938	98/98	1
Otu00274_275	Otu0353682	98/100	0.98
Otu00275_274	Otu0149940	99/100	0.99
Otu00276_272	Otu0472397	96/100	0.96
Otu00277_271	Otu0411873	98/100	0.98
Otu00278_270	Otu0390275	97/100	0.97
Otu00279_269	Otu0247365	99/100	0.99
Otu00280_268	Otu0391500	99/100	0.99
Otu00281_267	Otu0060043	96/100	0.96
Otu00282_267	Otu0210145	99/100	0.99
Otu00283_265	Otu0234176	99/100	0.99
Otu00284_265	Otu0063946	99/100	0.99
Otu00285_263	Otu0268075	99/100	0.99
Otu00286_261	Otu0263084	98/98	1
Otu00287_258	Otu0029282	100/100	1
Otu00288_257	Otu0311457	98/100	0.98
Otu00289_256	Otu0007983	100/100	1
Otu00290_253	Otu0001436	100/100	1
Otu00291_252	Otu0053644	97/100	0.97
Otu00292_251	Otu0014772	100/100	1
Otu00293_251	Otu0169729	100/100	1
Otu00294_245	Otu0372731	98/100	0.98
Otu00295_240	Otu0005595	100/100	1
Otu00296_238	Otu0002682	98/98	1
Otu00297_238	Otu0286997	98/100	0.98
Otu00298_238	Otu0351598	99/100	0.99
Otu00299_238	Otu0222114	99/100	0.99
Otu00300_237	Otu0049403	95/97	0.98
Otu00301_237	Otu0446314	98/100	0.98
Otu00302_236	Otu0000666	100/100	1
Otu00303_230	Otu0286082	98/99	0.99
Otu00304_230	Otu0000797	100/100	1
Otu00305_229	Otu0036555	99/100	0.99
Otu00306_228	Otu0270978	98/100	0.98
Otu00307_223	Otu0001400	100/100	1
Otu00308_220	Otu0000041	100/100	1
Otu00309_218	Otu0270978	98/100	0.98
Otu00310_217	Otu0000725	100/100	1
Otu00311_216	Otu0013567	99/100	0.99
Otu00312_215	Otu0127466	99/100	0.99
Otu00313_215	Otu0097795	99/100	0.99
Otu00314_215	Otu0228129	98/98	1
Otu00315_213	Otu0516572	98/100	0.98
Otu00316_213	Otu0000122	100/100	1
Otu00317_213	Otu0109627	98/100	0.98
Otu00318_209	Otu0194724	98/99	0.99
Otu00319_208	Otu0194724	98/99	0.99
Otu00320_207	Otu0007954	100/100	1
Otu00321_204	Otu0291557	97/97	1
Otu00322_203	Otu0000285	100/100	1
Otu00323_203	Otu0000797	100/100	1
Otu00324_202	Otu0000615	98/98	1
Otu00325_201	Otu0123089	97/98	0.99
Otu00326_199	Otu0003158	99/100	0.99
Otu00327_198	Otu0270978	98/100	0.98
Otu00328_198	Otu0356422	97/99	0.98
Otu00329_198	Otu0327211	99/100	0.99
Otu00330_197	Otu0475224	97/100	0.97
Otu00331_197	Otu0168643	98/100	0.98
Otu00332_195	Otu0134176	99/100	0.99
Otu00333_193	Otu0402369	98/100	0.98
Otu00334_192	Otu0095985	97/100	0.97
Otu00335_191	Otu0201677	99/100	0.99
Otu00336_191	Otu0367491	96/96	1
Otu00337_191	Otu0231559	99/100	0.99
Otu00338_190	Otu0269381	98/100	0.98
Otu00339_190	Otu0031837	98/99	0.99
Otu00340_190	Otu0003226	98/100	0.98
Otu00341_189	Otu0346895	97/98	0.99
Otu00342_188	Otu0013567	99/100	0.99
Otu00343_185	Otu0127466	99/100	0.99
Otu00344_185	Otu0127466	99/100	0.99
Otu00345_184	Otu0000005	100/100	1
Otu00346_184	Otu0127466	99/100	0.99
Otu00347_184	Otu0391500	99/100	0.99
Otu00348_184	Otu0294835	98/100	0.98
Otu00349_182	Otu0064738	98/98	1
Otu00350_182	Otu0175246	99/100	0.99
Otu00351_182	Otu0238129	99/100	0.99
Otu00352_182	Otu0176831	99/100	0.99
Otu00353_181	Otu0069941	98/98	1
Otu00354_180	Otu0127466	99/100	0.99
Otu00355_179	Otu0201572	98/100	0.98
Otu00357_178	Otu0007005	100/100	1
Otu00358_178	Otu0007983	100/100	1
Otu00359_178	Otu0036610	98/100	0.98
Otu00360_176	Otu0242573	98/99	0.99
Otu00361_175	Otu0181730	98/100	0.98
Otu00362_172	Otu0219412	81/89	0.91
Otu00363_172	Otu0000122	100/100	1
Otu00364_172	Otu0018962	100/100	1
Otu00365_171	Otu0413136	96/100	0.96
Otu00366_170	Otu0025210	100/100	1
Otu00367_169	Otu0492912	99/100	0.99
Otu00368_168	Otu0446302	98/99	0.99
Otu00369_168	Otu0000005	100/100	1
Otu00370_168	Otu0270978	98/100	0.98
Otu00371_166	Otu0139055	98/100	0.98
Otu00372_166	Otu0274314	99/100	0.99
Otu00373_163	Otu0000300	100/100	1
Otu00374_162	Otu0390275	96/100	0.96
Otu00375_161	Otu0045726	100/100	1
Otu00376_161	Otu0133739	100/100	1
Otu00377_158	Otu0006730	100/100	1
Otu00378_158	Otu0127466	99/100	0.99
Otu00379_157	Otu0027188	99/100	0.99
Otu00380_154	Otu0008637	96/98	0.98
Otu00381_154	Otu0016299	98/98	1
Otu00382_153	Otu0359997	98/100	0.98
Otu00383_152	Otu0084059	98/100	0.98
Otu00384_152	Otu0285733	99/100	0.99
Otu00385_152	Otu0176831	96/97	0.99
Otu00386_151	Otu0169418	97/100	0.97
Otu00387_151	Otu0166034	94/98	0.96
Otu00388_151	Otu0127466	99/100	0.99
Otu00389_149	Otu0013836	93/99	0.94
Otu00390_148	Otu0014677	100/100	1
Otu00391_147	Otu0253860	98/100	0.98
Otu00392_147	Otu0000797	100/100	1
Otu00393_147	Otu0071196	100/100	1
Otu00394_146	Otu0124104	99/100	0.99
Otu00395_146	Otu0508075	96/100	0.96
Otu00396_146	Otu0116482	97/98	0.99
Otu00397_145	Otu0013654	100/100	1
Otu00398_145	Otu0134842	99/100	0.99
Otu00399_143	Otu0220878	99/100	0.99
Otu00400_143	Otu0270978	98/100	0.98
Otu00401_141	Otu0515712	97/100	0.97
Otu00402_140	Otu0264627	98/100	0.98
Otu00403_140	Otu0000777	100/100	1
Otu00404_140	Otu0027644	100/100	1
Otu00405_138	Otu0199475	99/100	0.99
Otu00406_137	Otu0413136	97/100	0.97
Otu00407_137	Otu0251300	97/98	0.99
Otu00408_137	Otu0346359	99/100	0.99
Otu00409_137	Otu0322692	99/100	0.99
Otu00410_136	Otu0341546	99/100	0.99
Otu00411_135	Otu0199475	99/100	0.99
Otu00412_135	Otu0162629	99/100	0.99
Otu00413_135	Otu0009038	99/100	0.99
Otu00414_134	Otu0417199	97/100	0.97
Otu00415_133	Otu0251300	97/98	0.99
Otu00416_133	Otu0391500	99/100	0.99
Otu00417_131	Otu0013567	99/100	0.99
Otu00418_131	Otu0018977	100/100	1
Otu00419_130	Otu0261232	97/100	0.97
Otu00420_129	Otu0000797	100/100	1
Otu00421_129	Otu0151363	99/100	0.99
Otu00422_129	Otu0032171	99/100	0.99
Otu00423_128	Otu0516572	99/100	0.99
Otu00424_128	Otu0013567	99/100	0.99
Otu00425_127	Otu0270978	98/100	0.98
Otu00426_127	Otu0000041	100/100	1
Otu00427_127	Otu0322241	98/100	0.98
Otu00428_127	Otu0251300	99/100	0.99
Otu00429_127	Otu0251300	97/98	0.99
Otu00430_127	Otu0227054	98/100	0.98
Otu00431_126	Otu0385452	99/100	0.99
Otu00432_126	Otu0401142	98/100	0.98
Otu00433_126	Otu0233028	98/100	0.98
Otu00434_126	Otu0000001	100/100	1
Otu00435_126	Otu0000122	100/100	1
Otu00436_125	Otu0193218	99/100	0.99
Otu00437_125	Otu0174447	94/100	0.94
Otu00438_124	Otu0168643	98/100	0.98
Otu00439_124	Otu0359997	98/100	0.98
Otu00440_124	Otu0204414	98/99	0.99
Otu00441_124	Otu0270978	98/100	0.98
Otu00442_124	Otu0000122	100/100	1
Otu00443_124	Otu0001353	100/100	1
Otu00444_123	Otu0211768	99/100	0.99
Otu00445_122	Otu0002123	99/99	1
Otu00446_121	Otu0004517	100/100	1
Otu00447_121	Otu0013567	99/100	0.99
Otu00448_120	Otu0312604	96/97	0.99
Otu00449_120	Otu0000679	100/100	1
Otu00450_120	Otu0013567	99/100	0.99
Otu00451_120	Otu0502231	98/100	0.98
Otu00452_119	Otu0422882	98/100	0.98
Otu00453_119	Otu0007983	100/100	1
Otu00454_119	Otu0415979	99/100	0.99
Otu00455_118	Otu0000797	100/100	1
Otu00456_118	Otu0001011	100/100	1
Otu00457_117	Otu0110356	99/100	0.99
Otu00458_117	Otu0251300	97/98	0.99
Otu00459_117	Otu0120158	98/100	0.98
Otu00460_116	Otu0006547	99/100	0.99
Otu00461_115	Otu0340792	98/100	0.98
Otu00462_115	Otu0051518	99/100	0.99
Otu00463_114	Otu0013567	99/100	0.99
Otu00464_114	Otu0497737	100/100	1
Otu00465_114	Otu0003575	100/100	1
Otu00466_114	Otu0486091	99/100	0.99
Otu00467_114	Otu0007983	100/100	1
Otu00468_113	Otu0214405	97/100	0.97
Otu00469_113	Otu0277374	98/100	0.98
Otu00470_112	Otu0168643	98/100	0.98
Otu00471_112	Otu0013836	96/99	0.97
Otu00472_112	Otu0160877	98/98	1
Otu00473_112	Otu0083512	97/97	1
Otu00474_112	Otu0335126	95/100	0.95
Otu00475_112	Otu0352891	96/96	1
Otu00476_112	Otu0142522	99/100	0.99
Otu00477_111	Otu0283341	99/100	0.99
Otu00478_111	Otu0251300	97/98	0.99
Otu00479_110	Otu0313672	93/97	0.96
Otu00480_110	Otu0137996	94/97	0.97
Otu00481_110	Otu0153502	98/100	0.98
Otu00482_110	Otu0065954	96/100	0.96
Otu00483_110	Otu0004857	100/100	1
Otu00484_109	Otu0001353	100/100	1
Otu00485_109	Otu0109854	100/100	1
Otu00486_109	Otu0127466	99/100	0.99
Otu00487_109	Otu0007983	100/100	1
Otu00488_108	Otu0013567	99/100	0.99
Otu00489_108	Otu0498625	98/100	0.98
Otu00490_108	Otu0317057	99/100	0.99
Otu00491_108	Otu0163293	96/97	0.99
Otu00492_107	Otu0062415	98/99	0.99
Otu00493_107	Otu0000041	100/100	1
Otu00494_106	Otu0000797	100/100	1
Otu00495_106	Otu0185426	99/100	0.99
Otu00496_106	Otu0219791	98/100	0.98
Otu00497_106	Otu0125158	99/100	0.99
Otu00498_105	Otu0383267	97/97	1
Otu00499_105	Otu0076074	99/101	0.98
Otu00500_105	Otu0294835	96/100	0.96
Otu00501_105	Otu0170105	97/97	1
Otu00502_105	Otu0000236	100/100	1
Otu00503_105	Otu0000122	100/100	1
Otu00504_104	Otu0084941	98/98	1
Otu00505_104	Otu0168643	98/100	0.98
Otu00506_104	Otu0197598	98/99	0.99
Otu00507_103	Otu0288364	96/97	0.99
Otu00508_103	Otu0024875	98/100	0.98
Otu00509_103	Otu0104004	99/100	0.99
Otu00510_103	Otu0000041	100/100	1
Otu00511_101	Otu0007983	100/100	1
Otu00512_101	Otu0270978	98/100	0.98
Otu00513_100	Otu0000529	100/100	1
Otu00514_100	Otu0013567	99/100	0.99
Otu00515_100	Otu0030154	99/100	0.99
Otu00516_99	Otu0002197	97/98	0.99
Otu00517_99	Otu0090090	100/100	1
Otu00518_99	Otu0504778	97/101	0.96
Otu00519_99	Otu0500020	95/101	0.94
Otu00520_99	Otu0084941	98/98	1
Otu00521_99	Otu0201677	99/100	0.99
Otu00522_98	Otu0383882	96/100	0.96
Otu00523_98	Otu0134014	99/100	0.99
Otu00524_98	Otu0060640	99/100	0.99
Otu00525_97	Otu0431104	98/99	0.99
Otu00526_97	Otu0359997	98/100	0.98
Otu00527_96	Otu0000122	100/100	1
Otu00528_96	Otu0120998	99/100	0.99
Otu00529_96	Otu0110988	98/100	0.98
Otu00530_96	Otu0168643	98/100	0.98
Otu00531_95	Otu0003393	100/100	1
Otu00532_95	Otu0168118	99/100	0.99
Otu00533_95	Otu0029725	99/101	0.98
Otu00534_95	Otu0134014	99/100	0.99
Otu00535_95	Otu0347862	98/100	0.98
Otu00536_94	Otu0382307	99/100	0.99
Otu00537_94	Otu0042230	100/100	1
Otu00538_94	Otu0345515	95/97	0.98
Otu00539_94	Otu0168643	98/100	0.98
Otu00540_94	Otu0123350	98/99	0.99
Otu00541_94	Otu0001247	100/100	1
Otu00542_93	Otu0109627	93/98	0.95
Otu00543_93	Otu0000797	100/100	1
Otu00544_93	Otu0018578	99/100	0.99
Otu00545_93	Otu0013567	99/100	0.99
Otu00546_93	Otu0240218	99/100	0.99
Otu00547_92	Otu0283341	99/100	0.99
Otu00548_92	Otu0300065	98/100	0.98
Otu00549_92	Otu0200057	97/98	0.99
Otu00550_92	Otu0340792	98/100	0.98
Otu00551_91	Otu0270978	98/100	0.98
Otu00552_91	Otu0003630	99/100	0.99
Otu00553_91	Otu0039203	98/100	0.98
Otu00554_91	Otu0283341	99/100	0.99
Otu00555_90	Otu0352891	96/96	1
Otu00556_90	Otu0000041	100/100	1
Otu00557_90	Otu0391500	99/100	0.99
Otu00558_90	Otu0245552	100/100	1
Otu00559_90	Otu0000797	100/100	1
Otu00560_90	Otu0000041	100/100	1
Otu00561_89	Otu0309278	96/97	0.99
Otu00562_89	Otu0493668	97/100	0.97
Otu00563_89	Otu0380871	99/100	0.99
Otu00564_89	Otu0000481	100/100	1
Otu00565_89	Otu0000902	100/100	1
Otu00566_88	Otu0020369	100/100	1
Otu00567_88	Otu0015167	100/100	1
Otu00568_88	Otu0148275	99/100	0.99
Otu00569_88	Otu0000679	100/100	1
Otu00570_87	Otu0013567	99/100	0.99
Otu00571_87	Otu0014862	99/100	0.99
Otu00572_87	Otu0447369	97/100	0.97
Otu00573_87	Otu0000679	100/100	1
Otu00574_87	Otu0270978	98/100	0.98
Otu00575_86	Otu0013233	100/100	1
Otu00576_86	Otu0007983	100/100	1
Otu00577_86	Otu0270978	98/100	0.98
Otu00578_86	Otu0340792	98/100	0.98
Otu00579_86	Otu0056953	99/100	0.99
Otu00580_86	Otu0485775	96/100	0.96
Otu00581_85	Otu0212688	99/100	0.99
Otu00582_85	Otu0506198	99/100	0.99
Otu00583_85	Otu0291079	98/100	0.98
Otu00584_85	Otu0197668	98/100	0.98
Otu00585_85	Otu0001353	100/100	1
Otu00586_84	Otu0055659	97/97	1
Otu00587_84	Otu0125306	97/98	0.99
Otu00588_84	Otu0002031	100/100	1
Otu00589_84	Otu0153502	98/100	0.98
Otu00590_83	Otu0194724	98/99	0.99
Otu00591_83	Otu0483624	97/99	0.98
Otu00592_83	Otu0201677	99/100	0.99
Otu00593_83	Otu0000285	100/100	1
Otu00594_83	Otu0352891	96/96	1
Otu00595_82	Otu0105182	96/98	0.98
Otu00596_82	Otu0236283	92/97	0.95
Otu00597_82	Otu0340792	98/100	0.98
Otu00598_81	Otu0007983	100/100	1
Otu00599_81	Otu0007983	100/100	1
Otu00600_81	Otu0127466	99/100	0.99
Otu00601_81	Otu0449235	96/97	0.99
Otu00602_80	Otu0283341	99/100	0.99
Otu00603_80	Otu0270978	98/100	0.98
Otu00604_80	Otu0047132	99/100	0.99
Otu00605_80	Otu0168643	99/100	0.99
Otu00606_80	Otu0199475	99/100	0.99
Otu00607_80	Otu0007983	100/100	1
Otu00608_79	Otu0011298	100/100	1
Otu00609_79	Otu0013567	99/100	0.99
Otu00610_79	Otu0260526	99/100	0.99
Otu00611_79	Otu0018578	99/100	0.99
Otu00612_79	Otu0471190	93/100	0.93
Otu00613_79	Otu0000797	100/100	1
Otu00614_79	Otu0011258	99/100	0.99
Otu00615_79	Otu0291526	99/100	0.99
Otu00616_79	Otu0000005	100/100	1
Otu00617_78	Otu0168643	99/100	0.99
Otu00618_78	Otu0000001	100/100	1
Otu00619_78	Otu0341798	97/100	0.97
Otu00620_77	Otu0338554	99/100	0.99
Otu00621_77	Otu0488712	97/101	0.96
Otu00622_77	Otu0323841	98/100	0.98
Otu00623_77	Otu0135879	99/99	1
Otu00624_77	Otu0316461	96/98	0.98
Otu00625_76	Otu0421775	98/100	0.98
Otu00626_76	Otu0105100	99/100	0.99
Otu00627_76	Otu0018843	99/100	0.99
Otu00628_76	Otu0300994	97/100	0.97
Otu00629_76	Otu0127466	99/100	0.99
Otu00630_75	Otu0134740	99/100	0.99
Otu00631_75	Otu0001352	100/100	1
Otu00632_75	Otu0199475	99/100	0.99
Otu00633_75	Otu0000041	100/100	1
Otu00634_75	Otu0225412	96/100	0.96
Otu00635_75	Otu0007983	100/100	1
Otu00636_75	Otu0007983	100/100	1
Otu00637_75	Otu0124104	99/100	0.99
Otu00638_74	Otu0169418	97/100	0.97
Otu00639_74	Otu0126407	99/100	0.99
Otu00640_74	Otu0035489	99/100	0.99
Otu00641_74	Otu0098044	99/100	0.99
Otu00642_74	Otu0060661	99/100	0.99
Otu00643_73	Otu0002251	100/100	1
Otu00644_73	Otu0236580	98/100	0.98
Otu00645_73	Otu0000285	100/100	1
Otu00646_72	Otu0007193	98/98	1
Otu00647_72	Otu0076088	99/100	0.99
Otu00648_71	Otu0162629	99/100	0.99
Otu00649_71	Otu0283958	99/100	0.99
Otu00650_71	Otu0403787	93/98	0.95
Otu00651_71	Otu0127466	99/100	0.99
Otu00652_71	Otu0161059	94/97	0.97
Otu00653_71	Otu0371259	93/100	0.93
Otu00654_71	Otu0460486	87/92	0.95
Otu00655_71	Otu0264110	99/100	0.99
Otu00656_70	Otu0270978	98/100	0.98
Otu00657_70	Otu0367491	96/96	1
Otu00658_70	Otu0242446	97/97	1
Otu00659_70	Otu0329513	98/101	0.97
Otu00660_70	Otu0313868	100/100	1
Otu00661_70	Otu0000122	100/100	1
Otu00662_70	Otu0007983	100/100	1
Otu00663_69	Otu0000041	100/100	1
Otu00664_69	Otu0007983	100/100	1
Otu00665_69	Otu0110356	99/100	0.99
Otu00666_68	Otu0000285	100/100	1
Otu00667_68	Otu0001363	100/100	1
Otu00668_68	Otu0504502	94/97	0.97
Otu00669_68	Otu0149953	98/99	0.99
Otu00670_68	Otu0084059	98/100	0.98
Otu00671_68	Otu0233028	98/100	0.98
Otu00672_68	Otu0014002	100/100	1
Otu00673_68	Otu0270978	98/100	0.98
Otu00674_67	Otu0000285	100/100	1
Otu00675_67	Otu0186181	97/100	0.97
Otu00676_67	Otu0151663	98/100	0.98
Otu00677_67	Otu0134014	99/100	0.99
Otu00678_67	Otu0040888	98/100	0.98
Otu00679_67	Otu0000285	100/100	1
Otu00680_66	Otu0076825	97/100	0.97
Otu00681_66	Otu0377869	98/100	0.98
Otu00682_66	Otu0168643	98/100	0.98
Otu00683_66	Otu0283341	99/100	0.99
Otu00684_66	Otu0391500	99/100	0.99
Otu00685_66	Otu0000006	100/100	1
Otu00686_65	Otu0000041	100/100	1
Otu00687_65	Otu0000797	100/100	1
Otu00688_65	Otu0385946	89/99	0.9
Otu00689_65	Otu0209006	94/99	0.95
Otu00690_65	Otu0098642	96/100	0.96
Otu00691_65	Otu0172613	99/100	0.99
Otu00692_65	Otu0340792	98/100	0.98
Otu00693_65	Otu0293915	99/100	0.99
Otu00694_65	Otu0162629	99/100	0.99
Otu00695_65	Otu0391499	99/100	0.99
Otu00696_65	Otu0190340	98/100	0.98
Otu00697_65	Otu0007983	100/100	1
Otu00698_65	Otu0359997	98/100	0.98
Otu00699_64	Otu0299143	97/100	0.97
Otu00700_64	Otu0389759	93/97	0.96
Otu00701_64	Otu0149953	98/99	0.99
Otu00702_64	Otu0340792	98/100	0.98
Otu00703_64	Otu0287629	99/100	0.99
Otu00704_64	Otu0168643	98/100	0.98
Otu00705_64	Otu0073902	100/100	1
Otu00706_64	Otu0007983	100/100	1
Otu00707_63	Otu0045800	97/98	0.99
Otu00708_63	Otu0270978	98/100	0.98
Otu00709_63	Otu0013567	99/100	0.99
Otu00710_63	Otu0419549	97/98	0.99
Otu00711_63	Otu0127466	99/100	0.99
Otu00712_63	Otu0199475	99/100	0.99
Otu00713_63	Otu0016030	99/100	0.99
Otu00714_63	Otu0110988	98/100	0.98
Otu00715_62	Otu0007983	100/100	1
Otu00716_62	Otu0173433	95/97	0.98
Otu00717_62	Otu0127466	99/100	0.99
Otu00718_62	Otu0341559	97/100	0.97
Otu00719_62	Otu0313856	99/100	0.99
Otu00720_62	Otu0251300	97/98	0.99
Otu00721_62	Otu0091999	99/100	0.99
Otu00722_62	Otu0000005	100/100	1
Otu00723_62	Otu0000481	100/100	1
Otu00724_61	Otu0176835	100/100	1
Otu00725_61	Otu0168643	99/100	0.99
Otu00726_61	Otu0000122	100/100	1
Otu00727_61	Otu0323267	95/97	0.98
Otu00728_61	Otu0000005	100/100	1
Otu00729_61	Otu0483936	99/100	0.99
Otu00730_61	Otu0233028	98/100	0.98
Otu00731_61	Otu0138296	100/100	1
Otu00732_61	Otu0005971	98/100	0.98
Otu00733_61	Otu0127466	99/100	0.99
Otu00734_61	Otu0014775	99/100	0.99
Otu00735_61	Otu0383882	96/100	0.96
Otu00736_61	Otu0168643	98/100	0.98
Otu00737_60	Otu0056043	98/98	1
Otu00738_60	Otu0149618	98/98	1
Otu00739_60	Otu0000797	99/100	0.99
Otu00740_60	Otu0000285	100/100	1
Otu00741_60	Otu0006543	99/100	0.99
Otu00742_60	Otu0191430	99/99	1
Otu00743_60	Otu0271527	94/102	0.92
Otu00744_60	Otu0004738	99/100	0.99
Otu00745_60	Otu0000041	100/100	1
Otu00746_60	Otu0001353	100/100	1
Otu00747_59	Otu0057024	98/100	0.98
Otu00748_59	Otu0217475	99/100	0.99
Otu00749_59	Otu0359997	98/100	0.98
Otu00750_59	Otu0270978	98/100	0.98
Otu00751_59	Otu0497119	96/97	0.99
Otu00752_59	Otu0074491	99/100	0.99
Otu00753_59	Otu0270978	98/100	0.98
Otu00754_59	Otu0069941	98/98	1
Otu00755_58	Otu0006962	100/100	1
Otu00756_58	Otu0127466	99/100	0.99
Otu00757_58	Otu0068445	100/100	1
Otu00758_58	Otu0463984	59/65	0.91
Otu00759_58	Otu0270978	98/100	0.98
Otu00760_57	Otu0359997	98/100	0.98
Otu00761_57	Otu0233028	98/100	0.98
Otu00762_57	Otu0283341	99/100	0.99
Otu00763_57	Otu0079020	100/100	1
Otu00764_57	Otu0134014	99/100	0.99
Otu00765_57	Otu0413272	97/100	0.97
Otu00766_57	Otu0210632	95/100	0.95
Otu00767_57	Otu0001353	100/100	1
Otu00768_56	Otu0199475	99/100	0.99
Otu00769_56	Otu0072133	97/97	1
Otu00770_56	Otu0001353	100/100	1
Otu00771_56	Otu0442245	97/100	0.97
Otu00772_56	Otu0104118	99/100	0.99
Otu00773_56	Otu0129735	94/96	0.98
Otu00774_56	Otu0267526	99/100	0.99
Otu00775_56	Otu0391500	99/100	0.99
Otu00776_56	Otu0127466	99/100	0.99
Otu00777_56	Otu0411787	98/100	0.98
Otu00778_56	Otu0000279	100/100	1
Otu00779_56	Otu0013567	99/100	0.99
Otu00780_56	Otu0057790	98/100	0.98
Otu00781_56	Otu0019708	98/100	0.98
Otu00782_55	Otu0270978	98/100	0.98
Otu00783_55	Otu0013567	99/100	0.99
Otu00784_55	Otu0207856	99/100	0.99
Otu00785_55	Otu0023767	99/100	0.99
Otu00786_55	Otu0069856	97/97	1
Otu00787_55	Otu0001353	100/100	1
Otu00788_55	Otu0270978	98/100	0.98
Otu00789_55	Otu0254230	99/100	0.99
Otu00790_55	Otu0067190	100/100	1
Otu00791_55	Otu0013567	99/100	0.99
Otu00792_55	Otu0013567	99/100	0.99
Otu00793_55	Otu0172245	99/100	0.99
Otu00794_55	Otu0002770	98/100	0.98
Otu00795_54	Otu0127466	99/100	0.99
Otu00796_54	Otu0007983	100/100	1
Otu00797_54	Otu0025921	99/99	1
Otu00798_54	Otu0377506	98/100	0.98
Otu00799_54	Otu0020587	98/100	0.98
Otu00800_54	Otu0422882	98/100	0.98
Otu00801_54	Otu0417835	98/100	0.98
Otu00802_54	Otu0391543	99/100	0.99
Otu00803_54	Otu0014772	100/100	1
Otu00804_54	Otu0065499	99/100	0.99
Otu00805_53	Otu0212688	99/100	0.99
Otu00806_53	Otu0349649	98/100	0.98
Otu00807_53	Otu0127466	99/100	0.99
Otu00808_53	Otu0007983	100/100	1
Otu00809_53	Otu0243816	97/100	0.97
Otu00810_53	Otu0007983	100/100	1
Otu00811_53	Otu0349315	98/100	0.98
Otu00812_53	Otu0412687	98/100	0.98
Otu00813_53	Otu0236495	98/98	1
Otu00814_53	Otu0430813	97/100	0.97
Otu00815_53	Otu0408418	93/97	0.96
Otu00816_53	Otu0014011	99/100	0.99
Otu00817_53	Otu0496869	99/100	0.99
Otu00818_52	Otu0127466	99/100	0.99
Otu00819_52	Otu0108581	99/100	0.99
Otu00820_52	Otu0110988	99/100	0.99
Otu00821_52	Otu0463984	98/98	1
Otu00822_52	Otu0251300	97/98	0.99
Otu00823_52	Otu0160573	99/100	0.99
Otu00824_52	Otu0000797	99/100	0.99
Otu00825_52	Otu0026085	98/100	0.98
Otu00826_52	Otu0009742	99/100	0.99
Otu00827_51	Otu0199475	99/100	0.99
Otu00828_51	Otu0253056	97/97	1
Otu00829_51	Otu0008090	100/100	1
Otu00830_51	Otu0271920	99/100	0.99
Otu00831_51	Otu0000797	100/100	1
Otu00832_51	Otu0369088	97/99	0.98
Otu00833_51	Otu0049585	98/100	0.98
Otu00834_51	Otu0509131	95/100	0.95
Otu00835_51	Otu0232349	97/98	0.99
Otu00836_51	Otu0001353	100/100	1
Otu00837_51	Otu0199475	99/100	0.99
Otu00838_51	Otu0125362	99/100	0.99
Otu00839_51	Otu0513005	99/100	0.99
Otu00840_51	Otu0119028	100/100	1
Otu00841_51	Otu0000041	100/100	1
Otu00842_50	Otu0233028	98/100	0.98
Otu00843_50	Otu0002250	100/100	1
Otu00844_50	Otu0374650	98/100	0.98
Otu00845_50	Otu0232414	97/98	0.99
Otu00846_50	Otu0352891	96/96	1
Otu00847_50	Otu0163871	99/100	0.99
Otu00848_50	Otu0413103	98/99	0.99
Otu00849_50	Otu0066502	99/99	1
Otu00850_50	Otu0013567	99/100	0.99
Otu00851_50	Otu0018578	99/100	0.99
Otu00852_50	Otu0007983	100/100	1
Otu00853_50	Otu0127466	99/100	0.99
Otu00854_50	Otu0194724	98/99	0.99
Otu00855_49	Otu0270978	98/100	0.98
Otu00856_49	Otu0052965	100/100	1
Otu00857_49	Otu0001353	100/100	1
Otu00858_49	Otu0380580	96/100	0.96
Otu00859_49	Otu0282173	97/100	0.97
Otu00860_49	Otu0439053	91/100	0.91
Otu00861_49	Otu0267066	98/100	0.98
Otu00862_49	Otu0001056	100/100	1
Otu00863_48	Otu0190483	96/98	0.98
Otu00864_48	Otu0206107	98/99	0.99
Otu00865_48	Otu0377869	98/100	0.98
Otu00866_48	Otu0408046	98/100	0.98
Otu00867_48	Otu0499560	98/100	0.98
Otu00868_48	Otu0268075	99/100	0.99
Otu00869_48	Otu0000122	100/100	1
Otu00870_48	Otu0108242	96/100	0.96
Otu00871_48	Otu0291949	97/100	0.97
Otu00872_48	Otu0283341	99/100	0.99
Otu00873_48	Otu0251300	97/98	0.99
Otu00874_48	Otu0007983	100/100	1
Otu00875_48	Otu0005349	100/100	1
Otu00876_48	Otu0146846	99/100	0.99
Otu00877_48	Otu0059445	98/100	0.98
Otu00878_47	Otu0383882	96/100	0.96
Otu00879_47	Otu0489937	98/100	0.98
Otu00880_47	Otu0001728	100/100	1
Otu00881_47	Otu0403975	96/100	0.96
Otu00882_47	Otu0001455	100/100	1
Otu00883_47	Otu0007983	100/100	1
Otu00884_47	Otu0000122	100/100	1
Otu00885_47	Otu0340792	97/100	0.97
Otu00886_47	Otu0176396	97/97	1
Otu00887_47	Otu0199475	98/100	0.98
Otu00888_47	Otu0475240	97/100	0.97
Otu00889_47	Otu0270978	98/100	0.98
Otu00890_47	Otu0076647	99/100	0.99
Otu00891_46	Otu0149953	98/99	0.99
Otu00892_46	Otu0474947	97/100	0.97
Otu00893_46	Otu0069941	98/98	1
Otu00894_46	Otu0000670	100/100	1
Otu00895_46	Otu0168643	98/100	0.98
Otu00896_46	Otu0270978	98/100	0.98
Otu00897_46	Otu0199475	99/100	0.99
Otu00898_46	Otu0234243	94/100	0.94
Otu00899_46	Otu0007459	100/100	1
Otu00900_46	Otu0013567	99/100	0.99
Otu00901_46	Otu0000122	100/100	1
Otu00902_46	Otu0360298	99/100	0.99
Otu00903_46	Otu0212279	97/98	0.99
Otu00904_46	Otu0052063	98/98	1
Otu00905_46	Otu0146608	97/99	0.98
Otu00906_45	Otu0000797	100/100	1
Otu00907_45	Otu0434391	97/98	0.99
Otu00908_45	Otu0000797	100/100	1
Otu00909_45	Otu0013567	99/100	0.99
Otu00910_45	Otu0000797	100/100	1
Otu00911_45	Otu0000978	100/100	1
Otu00912_45	Otu0061561	98/100	0.98
Otu00913_45	Otu0018436	98/100	0.98
Otu00914_45	Otu0162629	99/100	0.99
Otu00915_45	Otu0266136	99/100	0.99
Otu00916_45	Otu0026101	99/100	0.99
Otu00917_45	Otu0472338	98/100	0.98
Otu00918_45	Otu0057781	99/100	0.99
Otu00919_45	Otu0378517	98/98	1
Otu00920_45	Otu0463413	94/100	0.94
Otu00921_45	Otu0359997	98/100	0.98
Otu00922_44	Otu0301596	99/99	1
Otu00923_44	Otu0042350	100/100	1
Otu00924_44	Otu0168643	98/100	0.98
Otu00925_44	Otu0002119	100/100	1
Otu00926_44	Otu0199475	99/100	0.99
Otu00927_44	Otu0127466	99/100	0.99
Otu00928_44	Otu0148275	99/100	0.99
Otu00929_44	Otu0110988	98/100	0.98
Otu00930_44	Otu0183660	97/98	0.99
Otu00931_44	Otu0007983	100/100	1
Otu00932_44	Otu0127466	99/100	0.99
Otu00933_44	Otu0001086	100/100	1
Otu00934_44	Otu0077451	97/100	0.97
Otu00935_43	Otu0406065	99/100	0.99
Otu00936_43	Otu0383882	96/100	0.96
Otu00937_43	Otu0001057	99/99	1
Otu00938_43	Otu0189469	96/99	0.97
Otu00939_43	Otu0030075	100/100	1
Otu00940_43	Otu0038090	98/99	0.99
Otu00941_43	Otu0343117	99/100	0.99
Otu00942_43	Otu0043984	90/98	0.92
Otu00943_43	Otu0000285	100/100	1
Otu00944_43	Otu0005880	100/100	1
Otu00945_43	Otu0299447	96/100	0.96
Otu00946_43	Otu0129195	97/97	1
Otu00947_43	Otu0212688	99/100	0.99
Otu00948_43	Otu0346274	95/100	0.95
Otu00949_42	Otu0251300	97/98	0.99
Otu00950_42	Otu0110988	99/100	0.99
Otu00951_42	Otu0283341	99/100	0.99
Otu00952_42	Otu0084798	96/96	1
Otu00953_42	Otu0153502	96/100	0.96
Otu00954_42	Otu0001368	100/100	1
Otu00955_42	Otu0123457	97/97	1
Otu00956_42	Otu0015369	99/100	0.99
Otu00957_42	Otu0251300	97/98	0.99
Otu00958_42	Otu0283341	99/100	0.99
Otu00959_42	Otu0313868	99/100	0.99
Otu00960_42	Otu0007983	100/100	1
Otu00961_42	Otu0283341	99/100	0.99
Otu00962_42	Otu0018578	99/100	0.99
Otu00963_42	Otu0000122	100/100	1
Otu00964_42	Otu0157240	98/100	0.98
Otu00965_42	Otu0007983	100/100	1
Otu00966_42	Otu0013567	99/100	0.99
Otu00967_42	Otu0018021	97/98	0.99
Otu00968_42	Otu0197333	97/98	0.99
Otu00969_42	Otu0127466	99/100	0.99
Otu00970_42	Otu0000481	100/100	1
Otu00971_41	Otu0007983	100/100	1
Otu00972_41	Otu0245358	99/100	0.99
Otu00973_41	Otu0021572	100/100	1
Otu00974_41	Otu0040530	98/98	1
Otu00975_41	Otu0016030	99/100	0.99
Otu00976_41	Otu0061376	99/99	1
Otu00977_41	Otu0163249	98/100	0.98
Otu00978_41	Otu0000797	100/100	1
Otu00979_41	Otu0089269	98/100	0.98
Otu00980_41	Otu0248783	94/97	0.97
Otu00981_41	Otu0094890	100/100	1
Otu00982_41	Otu0351794	96/100	0.96
Otu00983_41	Otu0168643	99/100	0.99
Otu00984_41	Otu0389964	97/99	0.98
Otu00985_41	Otu0303376	100/100	1
Otu00986_41	Otu0512070	98/100	0.98
Otu00987_40	Otu0313868	99/100	0.99
Otu00988_40	Otu0013787	100/100	1
Otu00989_40	Otu0168643	98/100	0.98
Otu00990_40	Otu0318901	97/100	0.97
Otu00991_40	Otu0051690	98/100	0.98
Otu00992_40	Otu0300024	95/98	0.97
Otu00993_40	Otu0294926	95/100	0.95
Otu00994_40	Otu0268075	99/100	0.99
Otu00995_40	Otu0062633	100/100	1
Otu00996_40	Otu0168643	99/100	0.99
Otu00997_40	Otu0011187	99/99	1
Otu00998_40	Otu0001353	100/100	1
Otu00999_40	Otu0000041	100/100	1
Otu01000_39	Otu0162629	99/100	0.99
Otu01001_39	Otu0168643	99/100	0.99
Otu01002_39	Otu0297437	99/100	0.99
Otu01003_39	Otu0302401	96/100	0.96
Otu01004_39	Otu0110356	99/100	0.99
Otu01005_39	Otu0028038	97/98	0.99
Otu01006_39	Otu0213332	99/100	0.99
Otu01007_39	Otu0289428	98/100	0.98
Otu01008_39	Otu0007686	98/100	0.98
Otu01009_39	Otu0015354	99/100	0.99
Otu01010_39	Otu0054425	97/100	0.97
Otu01011_39	Otu0463867	100/100	1
Otu01012_39	Otu0412866	98/100	0.98
Otu01013_39	Otu0013567	99/100	0.99
Otu01014_39	Otu0104139	98/100	0.98
Otu01015_38	Otu0001353	100/100	1
Otu01016_38	Otu0127574	98/100	0.98
Otu01017_38	Otu0233028	98/100	0.98
Otu01018_38	Otu0286612	97/100	0.97
Otu01019_38	Otu0056068	100/100	1
Otu01020_38	Otu0129735	93/96	0.97
Otu01021_38	Otu0017516	97/98	0.99
Otu01022_38	Otu0013567	99/100	0.99
Otu01023_38	Otu0007983	100/100	1
Otu01024_38	Otu0422882	98/100	0.98
Otu01025_38	Otu0110988	99/100	0.99
Otu01026_38	Otu0045367	98/100	0.98
Otu01027_38	Otu0422882	98/100	0.98
Otu01028_38	Otu0283341	99/100	0.99
Otu01029_38	Otu0019611	100/100	1
Otu01030_38	Otu0194724	98/99	0.99
Otu01031_38	Otu0017254	97/99	0.98
Otu01032_38	Otu0017982	100/100	1
Otu01033_38	Otu0302519	87/98	0.89
Otu01034_38	Otu0383882	96/100	0.96
Otu01035_38	Otu0013567	99/100	0.99
Otu01036_38	Otu0340792	98/100	0.98
Otu01037_38	Otu0248503	99/99	1
Otu01038_38	Otu0013567	99/100	0.99
Otu01039_37	Otu0095309	100/100	1
Otu01040_37	Otu0001113	98/100	0.98
Otu01041_37	Otu0334694	98/100	0.98
Otu01042_37	Otu0350897	96/97	0.99
Otu01043_37	Otu0294835	97/100	0.97
Otu01044_37	Otu0095386	99/100	0.99
Otu01045_37	Otu0422067	100/100	1
Otu01046_37	Otu0422882	98/100	0.98
Otu01047_37	Otu0423645	97/100	0.97
Otu01048_37	Otu0250319	96/100	0.96
Otu01049_37	Otu0007983	99/100	0.99
Otu01050_37	Otu0340792	98/100	0.98
Otu01051_37	Otu0199475	99/100	0.99
Otu01052_37	Otu0038988	100/100	1
Otu01053_37	Otu0005341	100/100	1
Otu01054_36	Otu0201677	99/100	0.99
Otu01055_36	Otu0016173	99/100	0.99
Otu01056_36	Otu0127466	99/100	0.99
Otu01057_36	Otu0141520	96/97	0.99
Otu01058_36	Otu0000171	100/100	1
Otu01059_36	Otu0013876	99/100	0.99
Otu01060_36	Otu0127466	99/100	0.99
Otu01061_36	Otu0015686	97/98	0.99
Otu01062_36	Otu0060517	99/100	0.99
Otu01063_36	Otu0422882	98/100	0.98
Otu01065_36	Otu0008332	100/100	1
Otu01066_36	Otu0340792	98/100	0.98
Otu01067_36	Otu0401503	98/100	0.98
Otu01068_36	Otu0234783	98/100	0.98
Otu01069_36	Otu0449471	98/100	0.98
Otu01070_36	Otu0042178	98/99	0.99
Otu01071_36	Otu0102405	99/100	0.99
Otu01072_36	Otu0091544	100/100	1
Otu01073_36	Otu0194724	98/99	0.99
Otu01074_36	Otu0094142	98/100	0.98
Otu01075_35	Otu0222012	97/100	0.97
Otu01076_35	Otu0481005	97/98	0.99
Otu01077_35	Otu0486219	99/100	0.99
Otu01078_35	Otu0109554	99/100	0.99
Otu01079_35	Otu0110988	99/100	0.99
Otu01080_35	Otu0418237	98/100	0.98
Otu01081_35	Otu0411787	98/100	0.98
Otu01082_35	Otu0000481	100/100	1
Otu01083_35	Otu0127466	99/100	0.99
Otu01084_35	Otu0212688	99/100	0.99
Otu01085_35	Otu0009283	98/98	1
Otu01086_35	Otu0078284	95/97	0.98
Otu01087_35	Otu0352103	98/100	0.98
Otu01088_35	Otu0000041	100/100	1
Otu01089_35	Otu0276309	99/100	0.99
Otu01090_35	Otu0149953	98/99	0.99
Otu01091_35	Otu0069993	99/100	0.99
Otu01092_35	Otu0077328	99/100	0.99
Otu01093_35	Otu0001353	100/100	1
Otu01094_35	Otu0110988	99/100	0.99
Otu01095_35	Otu0408381	97/100	0.97
Otu01096_35	Otu0154742	99/100	0.99
Otu01097_35	Otu0391500	99/100	0.99
Otu01098_35	Otu0001930	100/100	1
Otu01099_35	Otu0000797	100/100	1
Otu01100_35	Otu0001145	99/100	0.99
Otu01101_35	Otu0399814	94/97	0.97
Otu01102_35	Otu0052677	98/98	1
Otu01103_35	Otu0082946	99/100	0.99
Otu01104_35	Otu0251300	97/98	0.99
Otu01105_35	Otu0000041	100/100	1
Otu01106_35	Otu0022148	100/100	1
Otu01107_35	Otu0092590	98/99	0.99
Otu01108_34	Otu0019708	97/100	0.97
Otu01109_34	Otu0168643	98/100	0.98
Otu01110_34	Otu0377869	98/100	0.98
Otu01111_34	Otu0013567	99/100	0.99
Otu01112_34	Otu0000285	100/100	1
Otu01114_34	Otu0013343	97/99	0.98
Otu01115_34	Otu0040081	100/100	1
Otu01116_34	Otu0007983	100/100	1
Otu01117_34	Otu0076625	99/100	0.99
Otu01118_34	Otu0006616	95/97	0.98
Otu01119_34	Otu0199475	99/100	0.99
Otu01120_34	Otu0417969	98/100	0.98
Otu01121_34	Otu0124104	99/100	0.99
Otu01122_34	Otu0162629	99/100	0.99
Otu01123_34	Otu0005883	98/99	0.99
Otu01124_34	Otu0104834	99/100	0.99
Otu01125_34	Otu0007983	100/100	1
Otu01126_34	Otu0416074	95/96	0.99
Otu01127_34	Otu0496158	97/100	0.97
Otu01128_34	Otu0080230	98/100	0.98
Otu01129_34	Otu0007983	100/100	1
Otu01130_34	Otu0499605	99/100	0.99
Otu01131_34	Otu0000122	100/100	1
Otu01132_34	Otu0007983	100/100	1
Otu01133_34	Otu0196912	99/99	1
Otu01134_34	Otu0199475	99/100	0.99
Otu01135_34	Otu0000236	98/98	1
Otu01136_34	Otu0021481	99/100	0.99
Otu01137_34	Otu0027188	99/100	0.99
Otu01138_34	Otu0101317	98/100	0.98
Otu01139_33	Otu0036317	98/99	0.99
Otu01140_33	Otu0000481	100/100	1
Otu01141_33	Otu0035782	99/100	0.99
Otu01142_33	Otu0124104	99/100	0.99
Otu01143_33	Otu0016183	100/100	1
Otu01144_33	Otu0362744	97/98	0.99
Otu01145_33	Otu0036346	98/100	0.98
Otu01146_33	Otu0002050	100/100	1
Otu01147_33	Otu0484768	99/100	0.99
Otu01148_33	Otu0000122	100/100	1
Otu01149_33	Otu0007983	100/100	1
Otu01150_33	Otu0110356	99/100	0.99
Otu01151_33	Otu0140451	99/100	0.99
Otu01152_33	Otu0001216	100/100	1
Otu01153_33	Otu0115035	99/100	0.99
Otu01154_33	Otu0004109	98/100	0.98
Otu01155_33	Otu0413272	98/100	0.98
Otu01156_33	Otu0505501	99/100	0.99
Otu01157_33	Otu0069220	100/100	1
Otu01158_33	Otu0212688	99/100	0.99
Otu01159_33	Otu0251300	97/98	0.99
Otu01160_33	Otu0001113	98/100	0.98
Otu01161_33	Otu0007983	100/100	1
Otu01162_33	Otu0310001	99/100	0.99
Otu01163_33	Otu0046350	98/100	0.98
Otu01164_33	Otu0201830	96/96	1
Otu01165_32	Otu0209522	98/100	0.98
Otu01166_32	Otu0270978	98/100	0.98
Otu01167_32	Otu0051358	100/100	1
Otu01168_32	Otu0083434	100/100	1
Otu01169_32	Otu0167544	99/100	0.99
Otu01170_32	Otu0315774	98/100	0.98
Otu01171_32	Otu0242573	98/99	0.99
Otu01172_32	Otu0033716	100/100	1
Otu01173_32	Otu0376200	99/100	0.99
Otu01174_32	Otu0069941	98/98	1
Otu01175_32	Otu0134014	99/100	0.99
Otu01176_32	Otu0493716	100/100	1
Otu01177_32	Otu0251300	97/98	0.99
Otu01178_32	Otu0013567	99/100	0.99
Otu01179_32	Otu0042230	100/100	1
Otu01180_32	Otu0276423	98/100	0.98
Otu01181_32	Otu0270978	98/100	0.98
Otu01182_32	Otu0488737	98/100	0.98
Otu01183_32	Otu0049914	99/99	1
Otu01184_32	Otu0283341	99/100	0.99
Otu01185_32	Otu0466127	95/99	0.96
Otu01186_32	Otu0359997	98/100	0.98
Otu01187_32	Otu0045188	100/100	1
Otu01188_32	Otu0193006	99/100	0.99
Otu01189_32	Otu0212688	99/100	0.99
Otu01190_32	Otu0013567	99/100	0.99
Otu01191_32	Otu0110356	99/100	0.99
Otu01192_32	Otu0149953	98/99	0.99
Otu01193_32	Otu0113577	99/100	0.99
Otu01194_32	Otu0204995	98/98	1
Otu01195_32	Otu0079717	100/100	1
Otu01196_31	Otu0013567	99/100	0.99
Otu01197_31	Otu0000122	100/100	1
Otu01198_31	Otu0214300	98/100	0.98
Otu01199_31	Otu0000041	100/100	1
Otu01200_31	Otu0101290	92/96	0.96
Otu01201_31	Otu0066743	98/100	0.98
Otu01202_31	Otu0184644	99/100	0.99
Otu01203_31	Otu0496404	97/100	0.97
Otu01204_31	Otu0242309	97/100	0.97
Otu01205_31	Otu0351538	99/100	0.99
Otu01206_31	Otu0069941	98/98	1
Otu01207_31	Otu0055314	97/100	0.97
Otu01208_31	Otu0387131	97/100	0.97
Otu01209_31	Otu0097777	99/100	0.99
Otu01210_31	Otu0000797	100/100	1
Otu01211_31	Otu0194548	99/100	0.99
Otu01212_31	Otu0162629	99/100	0.99
Otu01213_31	Otu0054647	99/100	0.99
Otu01214_31	Otu0035972	99/100	0.99
Otu01215_31	Otu0124104	99/100	0.99
Otu01216_31	Otu0199475	99/100	0.99
Otu01217_31	Otu0000122	100/100	1
Otu01218_31	Otu0136304	86/96	0.9
Otu01219_31	Otu0168643	97/100	0.97
Otu01220_31	Otu0109554	99/100	0.99
Otu01221_31	Otu0096412	99/100	0.99
Otu01222_31	Otu0127466	99/100	0.99
Otu01223_31	Otu0000797	100/100	1
Otu01224_30	Otu0007983	100/100	1
Otu01225_30	Otu0003891	100/100	1
Otu01226_30	Otu0189464	99/100	0.99
Otu01227_30	Otu0367573	96/100	0.96
Otu01228_30	Otu0422880	98/99	0.99
Otu01229_30	Otu0098785	100/100	1
Otu01230_30	Otu0391500	99/100	0.99
Otu01231_30	Otu0194724	98/99	0.99
Otu01232_30	Otu0168643	98/100	0.98
Otu01233_30	Otu0023223	100/100	1
Otu01234_30	Otu0477885	97/100	0.97
Otu01235_30	Otu0084941	98/98	1
Otu01236_30	Otu0110988	98/100	0.98
Otu01237_30	Otu0270978	98/100	0.98
Otu01238_30	Otu0410382	97/100	0.97
Otu01239_30	Otu0509223	100/100	1
Otu01240_30	Otu0013567	99/100	0.99
Otu01241_30	Otu0064378	99/100	0.99
Otu01242_30	Otu0026101	99/100	0.99
Otu01243_30	Otu0243918	97/100	0.97
Otu01244_30	Otu0011758	99/100	0.99
Otu01245_30	Otu0125367	99/100	0.99
Otu01246_30	Otu0340792	98/100	0.98
Otu01247_30	Otu0169418	97/100	0.97
Otu01248_30	Otu0225412	97/100	0.97
Otu01249_30	Otu0236984	100/100	1
Otu01250_30	Otu0150860	98/100	0.98
Otu01251_29	Otu0000122	100/100	1
Otu01252_29	Otu0330980	98/100	0.98
Otu01253_29	Otu0077234	100/100	1
Otu01254_29	Otu0110356	99/100	0.99
Otu01255_29	Otu0055659	97/97	1
Otu01256_29	Otu0380580	97/100	0.97
Otu01257_29	Otu0233028	98/100	0.98
Otu01258_29	Otu0201677	99/100	0.99
Otu01259_29	Otu0010050	100/100	1
Otu01260_29	Otu0283341	99/100	0.99
Otu01261_29	Otu0489825	99/100	0.99
Otu01262_29	Otu0446267	97/100	0.97
Otu01263_29	Otu0007983	100/100	1
Otu01264_29	Otu0024038	100/100	1
Otu01265_29	Otu0007983	100/100	1
Otu01266_29	Otu0011335	96/100	0.96
Otu01267_29	Otu0058584	100/100	1
Otu01268_29	Otu0359997	98/100	0.98
Otu01269_29	Otu0010493	99/100	0.99
Otu01270_29	Otu0067717	99/100	0.99
Otu01271_29	Otu0000487	100/100	1
Otu01272_29	Otu0479606	92/97	0.95
Otu01273_29	Otu0103492	98/100	0.98
Otu01274_29	Otu0344597	97/100	0.97
Otu01275_29	Otu0397733	97/98	0.99
Otu01276_29	Otu0152503	100/100	1
Otu01277_29	Otu0000122	100/100	1
Otu01278_28	Otu0340792	98/100	0.98
Otu01279_28	Otu0000005	100/100	1
Otu01280_28	Otu0200684	98/100	0.98
Otu01281_28	Otu0324867	97/99	0.98
Otu01282_28	Otu0113770	66/76	0.87
Otu01283_28	Otu0000285	100/100	1
Otu01284_28	Otu0216674	99/100	0.99
Otu01285_28	Otu0298638	99/99	1
Otu01286_28	Otu0064423	98/100	0.98
Otu01287_28	Otu0000070	100/100	1
Otu01288_28	Otu0402831	100/100	1
Otu01289_28	Otu0020312	100/100	1
Otu01290_28	Otu0061950	100/100	1
Otu01291_28	Otu0377085	99/100	0.99
Otu01292_28	Otu0199475	99/100	0.99
Otu01293_28	Otu0194724	98/99	0.99
Otu01294_28	Otu0026027	98/100	0.98
Otu01295_28	Otu0235135	97/97	1
Otu01296_28	Otu0003379	100/100	1
Otu01297_28	Otu0194724	98/99	0.99
Otu01298_28	Otu0427936	93/93	1
Otu01299_28	Otu0030844	99/100	0.99
Otu01300_28	Otu0385765	90/96	0.94
Otu01301_28	Otu0149266	99/100	0.99
Otu01302_28	Otu0448067	95/100	0.95
Otu01303_28	Otu0340792	98/100	0.98
Otu01304_28	Otu0000285	100/100	1
Otu01305_28	Otu0127466	99/100	0.99
Otu01306_28	Otu0316562	98/99	0.99
Otu01307_28	Otu0013567	99/100	0.99
Otu01308_28	Otu0238346	98/100	0.98
Otu01309_28	Otu0512847	93/102	0.91
Otu01310_28	Otu0076625	99/100	0.99
Otu01311_28	Otu0251300	97/98	0.99
Otu01312_28	Otu0001871	100/100	1
Otu01313_28	Otu0251300	97/98	0.99
Otu01314_28	Otu0176831	94/95	0.99
Otu01315_27	Otu0000917	94/97	0.97
Otu01316_27	Otu0193662	99/100	0.99
Otu01317_27	Otu0072573	100/100	1
Otu01318_27	Otu0199475	99/100	0.99
Otu01319_27	Otu0283341	99/100	0.99
Otu01320_27	Otu0153502	96/100	0.96
Otu01321_27	Otu0261641	97/100	0.97
Otu01322_27	Otu0245651	98/99	0.99
Otu01323_27	Otu0008978	97/98	0.99
Otu01324_27	Otu0313119	98/100	0.98
Otu01325_27	Otu0491433	98/100	0.98
Otu01326_27	Otu0127466	99/100	0.99
Otu01327_27	Otu0222810	95/101	0.94
Otu01328_27	Otu0075951	99/100	0.99
Otu01329_27	Otu0340792	98/100	0.98
Otu01330_27	Otu0000679	100/100	1
Otu01331_27	Otu0000797	100/100	1
Otu01332_27	Otu0403608	96/98	0.98
Otu01333_27	Otu0127466	99/100	0.99
Otu01334_27	Otu0506198	93/100	0.93
Otu01335_27	Otu0000797	99/100	0.99
Otu01336_27	Otu0411787	98/100	0.98
Otu01337_27	Otu0002226	99/99	1
Otu01338_27	Otu0022927	99/100	0.99
Otu01339_27	Otu0270978	98/100	0.98
Otu01340_27	Otu0022741	99/99	1
Otu01341_27	Otu0270978	98/100	0.98
Otu01342_27	Otu0283341	99/100	0.99
Otu01343_27	Otu0280916	95/97	0.98
Otu01344_27	Otu0282582	99/100	0.99
Otu01345_27	Otu0011758	99/100	0.99
Otu01346_26	Otu0349059	99/100	0.99
Otu01347_26	Otu0033304	99/99	1
Otu01348_26	Otu0000041	100/100	1
Otu01349_26	Otu0232625	96/100	0.96
Otu01350_26	Otu0027188	99/100	0.99
Otu01351_26	Otu0088244	99/100	0.99
Otu01352_26	Otu0307132	98/100	0.98
Otu01353_26	Otu0374276	94/100	0.94
Otu01354_26	Otu0007983	100/100	1
Otu01355_26	Otu0377869	98/100	0.98
Otu01356_26	Otu0000122	100/100	1
Otu01357_26	Otu0127466	97/98	0.99
Otu01358_26	Otu0098851	98/100	0.98
Otu01359_26	Otu0007983	100/100	1
Otu01360_26	Otu0110356	99/100	0.99
Otu01361_26	Otu0216413	97/98	0.99
Otu01362_26	Otu0053821	100/100	1
Otu01363_26	Otu0492389	94/100	0.94
Otu01364_26	Otu0065096	96/100	0.96
Otu01365_26	Otu0025411	84/87	0.97
Otu01366_26	Otu0025921	99/99	1
Otu01367_26	Otu0161900	99/100	0.99
Otu01368_26	Otu0018578	99/100	0.99
Otu01369_26	Otu0504502	97/100	0.97
Otu01370_26	Otu0515995	98/100	0.98
Otu01371_26	Otu0312982	99/100	0.99
Otu01372_25	Otu0165252	98/100	0.98
Otu01373_25	Otu0168643	98/100	0.98
Otu01374_25	Otu0303377	98/100	0.98
Otu01375_25	Otu0029823	99/100	0.99
Otu01376_25	Otu0199475	96/98	0.98
Otu01377_25	Otu0054819	100/100	1
Otu01378_25	Otu0352891	96/96	1
Otu01379_25	Otu0000188	100/100	1
Otu01380_25	Otu0001353	100/100	1
Otu01381_25	Otu0000797	100/100	1
Otu01382_25	Otu0283341	99/100	0.99
Otu01383_25	Otu0000041	100/100	1
Otu01384_25	Otu0048946	100/100	1
Otu01385_25	Otu0017533	100/100	1
Otu01386_25	Otu0141520	96/97	0.99
Otu01387_25	Otu0269912	99/100	0.99
Otu01388_25	Otu0008925	100/100	1
Otu01389_25	Otu0270978	98/100	0.98
Otu01390_25	Otu0027675	100/100	1
Otu01391_25	Otu0018578	99/100	0.99
Otu01392_25	Otu0210632	97/100	0.97
Otu01393_25	Otu0289654	84/96	0.88
Otu01394_25	Otu0268795	99/100	0.99
Otu01395_25	Otu0348630	97/100	0.97
Otu01396_25	Otu0212688	99/100	0.99
Otu01397_25	Otu0076647	99/100	0.99
Otu01398_25	Otu0419549	97/98	0.99
Otu01399_25	Otu0000122	100/100	1
Otu01400_25	Otu0228019	99/100	0.99
Otu01401_25	Otu0513005	99/100	0.99
Otu01402_25	Otu0350095	98/100	0.98
Otu01403_25	Otu0168643	98/100	0.98
Otu01404_25	Otu0340792	98/100	0.98
Otu01405_25	Otu0005301	100/100	1
Otu01406_25	Otu0340792	98/100	0.98
Otu01407_25	Otu0007983	100/100	1
Otu01408_25	Otu0134014	99/100	0.99
Otu01409_25	Otu0000269	99/99	1
Otu01410_25	Otu0197536	99/100	0.99
Otu01411_25	Otu0005994	99/100	0.99
Otu01412_25	Otu0267056	99/100	0.99
Otu01413_25	Otu0000602	100/100	1
Otu01414_24	Otu0434165	98/99	0.99
Otu01415_24	Otu0091608	99/100	0.99
Otu01416_24	Otu0352891	96/96	1
Otu01417_24	Otu0359997	98/100	0.98
Otu01418_24	Otu0162629	99/100	0.99
Otu01419_24	Otu0013567	99/100	0.99
Otu01420_24	Otu0156439	98/101	0.97
Otu01421_24	Otu0000797	100/100	1
Otu01422_24	Otu0076625	99/100	0.99
Otu01423_24	Otu0252543	99/100	0.99
Otu01424_24	Otu0127466	99/100	0.99
Otu01426_24	Otu0110356	99/100	0.99
Otu01427_24	Otu0327211	99/100	0.99
Otu01428_24	Otu0457278	94/99	0.95
Otu01429_24	Otu0295960	88/96	0.92
Otu01430_24	Otu0340792	98/100	0.98
Otu01431_24	Otu0000041	100/100	1
Otu01432_24	Otu0075240	97/97	1
Otu01433_24	Otu0013567	99/100	0.99
Otu01434_24	Otu0013567	99/100	0.99
Otu01435_24	Otu0000490	100/100	1
Otu01436_24	Otu0509142	96/100	0.96
Otu01437_24	Otu0000797	100/100	1
Otu01438_24	Otu0352891	96/96	1
Otu01439_24	Otu0483936	99/100	0.99
Otu01440_24	Otu0000797	100/100	1
Otu01441_24	Otu0026101	97/100	0.97
Otu01442_24	Otu0013567	99/100	0.99
Otu01443_24	Otu0162629	99/100	0.99
Otu01444_24	Otu0408960	96/98	0.98
Otu01445_24	Otu0127466	99/100	0.99
Otu01446_24	Otu0134877	98/99	0.99
Otu01447_24	Otu0270978	98/100	0.98
Otu01448_24	Otu0171100	97/97	1
Otu01449_23	Otu0318753	98/100	0.98
Otu01450_23	Otu0216226	99/100	0.99
Otu01451_23	Otu0514671	92/100	0.92
Otu01452_23	Otu0270978	98/100	0.98
Otu01453_23	Otu0383935	94/100	0.94
Otu01454_23	Otu0270978	98/100	0.98
Otu01455_23	Otu0074744	99/100	0.99
Otu01457_23	Otu0199475	99/100	0.99
Otu01458_23	Otu0007983	100/100	1
Otu01459_23	Otu0127466	99/100	0.99
Otu01460_23	Otu0110988	99/100	0.99
Otu01461_23	Otu0270978	98/100	0.98
Otu01462_23	Otu0001353	100/100	1
Otu01463_23	Otu0004127	100/100	1
Otu01464_23	Otu0448852	98/100	0.98
Otu01465_23	Otu0423820	97/98	0.99
Otu01466_23	Otu0324554	99/100	0.99
Otu01467_23	Otu0000797	100/100	1
Otu01468_23	Otu0270978	98/100	0.98
Otu01469_23	Otu0413169	98/100	0.98
Otu01470_23	Otu0002050	99/100	0.99
Otu01471_23	Otu0000041	100/100	1
Otu01472_23	Otu0069902	100/100	1
Otu01473_23	Otu0299372	98/100	0.98
Otu01474_23	Otu0133168	98/100	0.98
Otu01475_23	Otu0243816	97/100	0.97
Otu01476_23	Otu0168643	99/100	0.99
Otu01477_23	Otu0263904	98/100	0.98
Otu01478_23	Otu0379379	98/100	0.98
Otu01479_23	Otu0001353	100/100	1
Otu01480_23	Otu0340792	98/100	0.98
Otu01481_23	Otu0413045	96/100	0.96
Otu01482_23	Otu0202870	99/100	0.99
Otu01483_23	Otu0203150	97/100	0.97
Otu01484_23	Otu0340935	93/100	0.93
Otu01485_23	Otu0340792	98/100	0.98
Otu01486_23	Otu0268868	99/100	0.99
Otu01487_23	Otu0002682	98/98	1
Otu01488_23	Otu0348609	99/100	0.99
Otu01489_23	Otu0283341	99/100	0.99
Otu01490_23	Otu0393322	89/97	0.92
Otu01491_23	Otu0000797	100/100	1
Otu01492_23	Otu0212688	99/100	0.99
Otu01493_23	Otu0014862	99/100	0.99
Otu01494_23	Otu0342510	97/97	1
Otu01495_23	Otu0083084	98/100	0.98
Otu01496_23	Otu0000070	100/100	1
Otu01497_23	Otu0028857	98/99	0.99
Otu01498_22	Otu0389139	97/99	0.98
Otu01499_22	Otu0276145	99/100	0.99
Otu01500_22	Otu0007983	100/100	1
Otu01501_22	Otu0283341	99/100	0.99
Otu01502_22	Otu0127466	99/100	0.99
Otu01503_22	Otu0000122	100/100	1
Otu01504_22	Otu0500199	98/100	0.98
Otu01505_22	Otu0000136	100/100	1
Otu01506_22	Otu0045590	100/100	1
Otu01507_22	Otu0007983	100/100	1
Otu01508_22	Otu0444350	91/100	0.91
Otu01509_22	Otu0176831	96/97	0.99
Otu01510_22	Otu0233028	98/100	0.98
Otu01511_22	Otu0391500	99/100	0.99
Otu01512_22	Otu0161059	98/100	0.98
Otu01513_22	Otu0504502	97/100	0.97
Otu01514_22	Otu0010991	100/100	1
Otu01515_22	Otu0013567	99/100	0.99
Otu01516_22	Otu0385932	98/99	0.99
Otu01517_22	Otu0009742	99/100	0.99
Otu01518_22	Otu0221066	99/100	0.99
Otu01519_22	Otu0134014	99/100	0.99
Otu01520_22	Otu0100469	99/100	0.99
Otu01521_22	Otu0125861	99/100	0.99
Otu01522_22	Otu0199475	99/100	0.99
Otu01523_22	Otu0359997	98/100	0.98
Otu01524_22	Otu0474365	97/100	0.97
Otu01525_22	Otu0350897	98/98	1
Otu01526_22	Otu0000041	100/100	1
Otu01527_22	Otu0124104	99/100	0.99
Otu01528_22	Otu0009742	99/100	0.99
Otu01529_22	Otu0055086	99/100	0.99
Otu01530_22	Otu0300140	99/100	0.99
Otu01531_22	Otu0391500	99/100	0.99
Otu01532_22	Otu0412866	98/100	0.98
Otu01533_22	Otu0364809	100/100	1
Otu01534_22	Otu0000055	100/100	1
Otu01535_22	Otu0226641	98/100	0.98
Otu01536_22	Otu0298713	95/98	0.97
Otu01537_22	Otu0013567	99/100	0.99
Otu01538_22	Otu0346467	99/100	0.99
Otu01539_22	Otu0001353	100/100	1
Otu01540_22	Otu0077731	100/100	1
Otu01541_22	Otu0377869	98/100	0.98
Otu01542_22	Otu0026101	99/100	0.99
Otu01543_22	Otu0283341	99/100	0.99
Otu01544_22	Otu0127466	99/100	0.99
Otu01545_22	Otu0013567	99/100	0.99
Otu01546_22	Otu0095928	99/100	0.99
Otu01547_22	Otu0168643	98/100	0.98
Otu01548_22	Otu0000797	100/100	1
Otu01549_22	Otu0037310	100/100	1
Otu01550_22	Otu0110356	99/100	0.99
Otu01551_22	Otu0069941	98/98	1
Otu01552_22	Otu0383882	96/100	0.96
Otu01553_22	Otu0419827	97/98	0.99
Otu01554_22	Otu0013567	99/100	0.99
Otu01555_22	Otu0400528	95/100	0.95
Otu01556_21	Otu0110356	99/100	0.99
Otu01557_21	Otu0127466	99/100	0.99
Otu01558_21	Otu0402110	94/99	0.95
Otu01559_21	Otu0161009	99/100	0.99
Otu01560_21	Otu0127466	99/100	0.99
Otu01561_21	Otu0109554	99/100	0.99
Otu01562_21	Otu0069941	98/98	1
Otu01563_21	Otu0176063	99/100	0.99
Otu01564_21	Otu0168643	98/100	0.98
Otu01565_21	Otu0344797	98/100	0.98
Otu01566_21	Otu0000041	100/100	1
Otu01567_21	Otu0264149	97/100	0.97
Otu01568_21	Otu0001353	100/100	1
Otu01569_21	Otu0308207	99/100	0.99
Otu01570_21	Otu0000122	100/100	1
Otu01571_21	Otu0485029	99/100	0.99
Otu01572_21	Otu0000285	100/100	1
Otu01573_21	Otu0241689	98/100	0.98
Otu01574_21	Otu0065949	96/99	0.97
Otu01575_21	Otu0383882	96/100	0.96
Otu01576_21	Otu0105061	100/100	1
Otu01577_21	Otu0341546	99/101	0.98
Otu01578_21	Otu0262266	98/100	0.98
Otu01579_21	Otu0187948	99/100	0.99
Otu01580_21	Otu0340043	99/100	0.99
Otu01581_21	Otu0340792	98/100	0.98
Otu01582_21	Otu0082033	97/100	0.97
Otu01583_21	Otu0129199	97/100	0.97
Otu01584_21	Otu0497737	96/100	0.96
Otu01585_21	Otu0268075	99/100	0.99
Otu01586_21	Otu0036604	99/100	0.99
Otu01587_21	Otu0003936	99/100	0.99
Otu01588_21	Otu0000679	100/100	1
Otu01589_21	Otu0127466	99/100	0.99
Otu01590_21	Otu0270978	98/100	0.98
Otu01591_21	Otu0387058	87/91	0.96
Otu01592_21	Otu0053092	99/100	0.99
Otu01593_21	Otu0000122	100/100	1
Otu01594_21	Otu0000041	100/100	1
Otu01595_21	Otu0069250	100/100	1
Otu01596_21	Otu0036604	99/100	0.99
Otu01597_21	Otu0233028	98/100	0.98
Otu01598_21	Otu0039517	100/100	1
Otu01599_21	Otu0268075	99/100	0.99
Otu01600_21	Otu0259546	99/100	0.99
Otu01601_21	Otu0000797	100/100	1
Otu01602_21	Otu0225412	93/100	0.93
Otu01603_21	Otu0168643	99/100	0.99
Otu01604_21	Otu0168643	98/100	0.98
Otu01605_21	Otu0452583	90/96	0.94
Otu01606_21	Otu0282421	99/100	0.99
Otu01607_21	Otu0127466	99/100	0.99
Otu01608_21	Otu0210795	98/100	0.98
Otu01609_21	Otu0000005	100/100	1
Otu01610_21	Otu0003080	100/100	1
Otu01611_21	Otu0334423	96/100	0.96
Otu01612_21	Otu0000041	100/100	1
Otu01613_21	Otu0402736	99/100	0.99
Otu01614_20	Otu0414924	98/100	0.98
Otu01615_20	Otu0270978	98/100	0.98
Otu01616_20	Otu0240278	99/100	0.99
Otu01617_20	Otu0124104	99/100	0.99
Otu01618_20	Otu0435238	98/100	0.98
Otu01619_20	Otu0204757	100/100	1
Otu01620_20	Otu0340792	98/100	0.98
Otu01621_20	Otu0000313	98/98	1
Otu01622_20	Otu0383882	96/100	0.96
Otu01623_20	Otu0359997	98/100	0.98
Otu01624_20	Otu0201512	98/100	0.98
Otu01625_20	Otu0168643	98/100	0.98
Otu01626_20	Otu0110988	99/100	0.99
Otu01627_20	Otu0013567	99/100	0.99
Otu01628_20	Otu0029714	98/99	0.99
Otu01630_20	Otu0310169	97/100	0.97
Otu01631_20	Otu0127466	99/100	0.99
Otu01632_20	Otu0182782	97/100	0.97
Otu01633_20	Otu0077780	89/100	0.89
Otu01634_20	Otu0277374	98/100	0.98
Otu01635_20	Otu0412838	98/100	0.98
Otu01636_20	Otu0200534	99/100	0.99
Otu01637_20	Otu0013567	99/100	0.99
Otu01638_20	Otu0038929	97/97	1
Otu01639_20	Otu0013567	99/100	0.99
Otu01640_20	Otu0000797	100/100	1
Otu01641_20	Otu0377869	98/100	0.98
Otu01642_20	Otu0412866	98/100	0.98
Otu01643_20	Otu0069941	98/98	1
Otu01644_20	Otu0270978	98/100	0.98
Otu01645_20	Otu0476576	97/100	0.97
Otu01646_20	Otu0000122	100/100	1
Otu01647_20	Otu0425534	98/100	0.98
Otu01648_20	Otu0000285	100/100	1
Otu01649_20	Otu0045272	98/100	0.98
Otu01650_20	Otu0110356	99/100	0.99
Otu01651_20	Otu0111871	98/100	0.98
Otu01652_20	Otu0199475	99/100	0.99
Otu01653_20	Otu0110988	99/100	0.99
Otu01654_20	Otu0000797	100/100	1
Otu01655_20	Otu0000481	100/100	1
Otu01656_20	Otu0000679	100/100	1
Otu01657_20	Otu0124104	99/100	0.99
Otu01658_20	Otu0340792	98/100	0.98
Otu01659_20	Otu0335915	96/98	0.98
Otu01660_20	Otu0044016	100/100	1
Otu01661_20	Otu0377869	98/100	0.98
Otu01662_20	Otu0001531	100/100	1
Otu01663_20	Otu0011043	96/98	0.98
Otu01664_19	Otu0000122	100/100	1
Otu01665_19	Otu0371326	99/100	0.99
Otu01666_19	Otu0352891	96/96	1
Otu01667_19	Otu0110988	98/100	0.98
Otu01668_19	Otu0412866	98/100	0.98
Otu01669_19	Otu0022927	99/100	0.99
Otu01670_19	Otu0340792	98/100	0.98
Otu01671_19	Otu0013567	99/100	0.99
Otu01672_19	Otu0001353	100/100	1
Otu01673_19	Otu0096412	99/100	0.99
Otu01674_19	Otu0172740	98/100	0.98
Otu01675_19	Otu0025612	100/100	1
Otu01676_19	Otu0000797	100/100	1
Otu01677_19	Otu0242573	98/99	0.99
Otu01678_19	Otu0000520	97/100	0.97
Otu01679_19	Otu0383882	96/100	0.96
Otu01680_19	Otu0127466	99/100	0.99
Otu01681_19	Otu0203723	96/97	0.99
Otu01682_19	Otu0127466	99/100	0.99
Otu01683_19	Otu0201371	99/100	0.99
Otu01684_19	Otu0000797	100/100	1
Otu01685_19	Otu0000136	100/100	1
Otu01686_19	Otu0199475	99/100	0.99
Otu01687_19	Otu0168643	98/100	0.98
Otu01688_19	Otu0411901	98/100	0.98
Otu01689_19	Otu0371689	99/100	0.99
Otu01690_19	Otu0110988	98/100	0.98
Otu01691_19	Otu0069856	97/97	1
Otu01692_19	Otu0011605	97/98	0.99
Otu01693_19	Otu0079717	97/97	1
Otu01694_19	Otu0377869	98/100	0.98
Otu01695_19	Otu0013567	99/100	0.99
Otu01696_19	Otu0283341	99/100	0.99
Otu01697_19	Otu0104834	99/100	0.99
Otu01698_19	Otu0377869	98/100	0.98
Otu01699_19	Otu0013567	99/100	0.99
Otu01700_19	Otu0367916	98/100	0.98
Otu01701_19	Otu0013567	99/100	0.99
Otu01702_19	Otu0014862	99/100	0.99
Otu01703_19	Otu0201677	99/100	0.99
Otu01704_19	Otu0000122	100/100	1
Otu01705_19	Otu0000122	100/100	1
Otu01706_19	Otu0377869	98/100	0.98
Otu01707_19	Otu0250360	95/100	0.95
Otu01708_19	Otu0014452	97/98	0.99
Otu01709_19	Otu0000665	99/99	1
Otu01710_19	Otu0233290	98/100	0.98
Otu01711_19	Otu0013567	99/100	0.99
Otu01712_19	Otu0168379	97/101	0.96
Otu01713_19	Otu0030158	98/100	0.98
Otu01714_19	Otu0000285	100/100	1
Otu01715_19	Otu0499602	95/100	0.95
Otu01716_19	Otu0038988	98/100	0.98
Otu01717_19	Otu0504342	94/97	0.97
Otu01718_19	Otu0007983	100/100	1
Otu01719_19	Otu0113770	65/76	0.86
Otu01720_19	Otu0013567	99/100	0.99
Otu01721_19	Otu0000070	100/100	1
Otu01722_19	Otu0116654	99/100	0.99
Otu01723_18	Otu0000615	100/100	1
Otu01724_18	Otu0267056	99/100	0.99
Otu01725_18	Otu0110988	99/100	0.99
Otu01726_18	Otu0056012	100/100	1
Otu01727_18	Otu0000797	97/97	1
Otu01728_18	Otu0110988	99/100	0.99
Otu01729_18	Otu0051462	98/100	0.98
Otu01730_18	Otu0341243	98/100	0.98
Otu01731_18	Otu0304892	96/100	0.96
Otu01732_18	Otu0000005	100/100	1
Otu01733_18	Otu0111330	94/97	0.97
Otu01734_18	Otu0000679	100/100	1
Otu01735_18	Otu0013567	99/100	0.99
Otu01736_18	Otu0007867	100/100	1
Otu01737_18	Otu0000377	100/100	1
Otu01738_18	Otu0156615	98/100	0.98
Otu01739_18	Otu0414804	98/100	0.98
Otu01740_18	Otu0274372	97/100	0.97
Otu01741_18	Otu0069941	98/98	1
Otu01742_18	Otu0473211	92/98	0.94
Otu01743_18	Otu0144768	97/100	0.97
Otu01744_18	Otu0343117	99/100	0.99
Otu01745_18	Otu0000005	99/99	1
Otu01746_18	Otu0283341	99/100	0.99
Otu01747_18	Otu0039844	100/100	1
Otu01748_18	Otu0121594	98/100	0.98
Otu01749_18	Otu0009742	99/100	0.99
Otu01750_18	Otu0324878	99/100	0.99
Otu01751_18	Otu0194724	98/99	0.99
Otu01752_18	Otu0516257	94/97	0.97
Otu01753_18	Otu0019016	95/99	0.96
Otu01754_18	Otu0207774	98/99	0.99
Otu01755_18	Otu0111379	100/100	1
Otu01756_18	Otu0169418	97/100	0.97
Otu01757_18	Otu0104382	100/100	1
Otu01758_18	Otu0000679	100/100	1
Otu01759_18	Otu0009136	100/100	1
Otu01760_18	Otu0269381	96/100	0.96
Otu01761_18	Otu0013567	99/100	0.99
Otu01762_18	Otu0271319	96/98	0.98
Otu01763_18	Otu0340792	98/100	0.98
Otu01764_18	Otu0429602	97/100	0.97
Otu01765_18	Otu0176831	96/97	0.99
Otu01766_18	Otu0127578	99/100	0.99
Otu01767_18	Otu0060863	99/100	0.99
Otu01768_18	Otu0007983	100/100	1
Otu01769_18	Otu0108233	98/100	0.98
Otu01770_18	Otu0310528	97/97	1
Otu01771_18	Otu0412634	95/97	0.98
Otu01772_18	Otu0000005	100/100	1
Otu01773_18	Otu0000122	100/100	1
Otu01774_18	Otu0000041	100/100	1
Otu01775_18	Otu0052854	99/100	0.99
Otu01776_18	Otu0000481	100/100	1
Otu01777_18	Otu0513540	97/99	0.98
Otu01778_17	Otu0141520	96/97	0.99
Otu01779_17	Otu0109554	99/100	0.99
Otu01780_17	Otu0168643	98/100	0.98
Otu01781_17	Otu0018578	99/100	0.99
Otu01782_17	Otu0251300	97/98	0.99
Otu01783_17	Otu0410594	97/100	0.97
Otu01784_17	Otu0030018	98/99	0.99
Otu01785_17	Otu0014872	97/100	0.97
Otu01786_17	Otu0013567	99/100	0.99
Otu01787_17	Otu0052854	97/97	1
Otu01788_17	Otu0137176	98/100	0.98
Otu01789_17	Otu0309516	98/100	0.98
Otu01790_17	Otu0025921	99/99	1
Otu01791_17	Otu0000279	100/100	1
Otu01792_17	Otu0402426	98/100	0.98
Otu01793_17	Otu0387833	97/100	0.97
Otu01794_17	Otu0306014	98/100	0.98
Otu01795_17	Otu0283341	99/100	0.99
Otu01796_17	Otu0391500	97/100	0.97
Otu01797_17	Otu0000797	100/100	1
Otu01798_17	Otu0155431	98/99	0.99
Otu01799_17	Otu0387131	97/100	0.97
Otu01800_17	Otu0168643	98/100	0.98
Otu01801_17	Otu0000679	100/100	1
Otu01802_17	Otu0473688	90/96	0.94
Otu01803_17	Otu0201677	96/97	0.99
Otu01804_17	Otu0000797	100/100	1
Otu01805_17	Otu0110988	99/100	0.99
Otu01806_17	Otu0210145	99/100	0.99
Otu01807_17	Otu0359997	98/100	0.98
Otu01808_17	Otu0196119	99/100	0.99
Otu01809_17	Otu0005815	100/100	1
Otu01810_17	Otu0000797	100/100	1
Otu01811_17	Otu0147522	99/100	0.99
Otu01812_17	Otu0000122	100/100	1
Otu01813_17	Otu0000041	100/100	1
Otu01814_17	Otu0162629	99/100	0.99
Otu01815_17	Otu0116212	97/99	0.98
Otu01816_17	Otu0194724	98/99	0.99
Otu01817_17	Otu0000041	100/100	1
Otu01818_17	Otu0000005	100/100	1
Otu01819_17	Otu0013567	99/100	0.99
Otu01820_17	Otu0013567	99/100	0.99
Otu01821_17	Otu0000122	100/100	1
Otu01822_17	Otu0000797	100/100	1
Otu01823_17	Otu0007983	100/100	1
Otu01824_17	Otu0000005	100/100	1
Otu01825_17	Otu0110356	99/100	0.99
Otu01826_17	Otu0334423	96/100	0.96
Otu01827_17	Otu0233420	92/100	0.92
Otu01828_17	Otu0247686	97/100	0.97
Otu01829_17	Otu0169794	98/99	0.99
Otu01830_17	Otu0251300	97/99	0.98
Otu01831_17	Otu0270978	98/100	0.98
Otu01832_17	Otu0422882	98/100	0.98
Otu01833_17	Otu0149178	99/100	0.99
Otu01834_17	Otu0170239	100/100	1
Otu01835_17	Otu0110988	98/100	0.98
Otu01836_17	Otu0097618	100/100	1
Otu01837_17	Otu0514705	97/100	0.97
Otu01838_17	Otu0470643	97/100	0.97
Otu01839_17	Otu0412866	98/100	0.98
Otu01840_17	Otu0459056	70/78	0.9
Otu01841_17	Otu0104834	99/100	0.99
Otu01842_17	Otu0026101	99/100	0.99
Otu01843_17	Otu0060703	99/100	0.99
Otu01844_17	Otu0504245	91/96	0.95
Otu01845_17	Otu0076384	98/100	0.98
Otu01846_17	Otu0199475	98/100	0.98
Otu01847_17	Otu0087887	99/100	0.99
Otu01848_17	Otu0391500	99/100	0.99
Otu01849_17	Otu0068892	100/100	1
Otu01850_16	Otu0065499	99/100	0.99
Otu01851_16	Otu0000285	100/100	1
Otu01852_16	Otu0149953	98/99	0.99
Otu01853_16	Otu0000122	100/100	1
Otu01854_16	Otu0141520	96/97	0.99
Otu01855_16	Otu0216674	99/100	0.99
Otu01856_16	Otu0015270	100/100	1
Otu01857_16	Otu0091646	99/100	0.99
Otu01858_16	Otu0176831	95/97	0.98
Otu01859_16	Otu0391500	99/100	0.99
Otu01860_16	Otu0000136	100/100	1
Otu01861_16	Otu0247269	99/100	0.99
Otu01862_16	Otu0375846	97/100	0.97
Otu01863_16	Otu0359997	98/100	0.98
Otu01864_16	Otu0133775	98/99	0.99
Otu01865_16	Otu0168643	99/100	0.99
Otu01866_16	Otu0498116	98/100	0.98
Otu01867_16	Otu0194707	100/100	1
Otu01868_16	Otu0486959	96/100	0.96
Otu01869_16	Otu0030886	99/100	0.99
Otu01870_16	Otu0340433	97/100	0.97
Otu01871_16	Otu0349315	98/100	0.98
Otu01872_16	Otu0046177	93/98	0.95
Otu01873_16	Otu0000122	100/100	1
Otu01874_16	Otu0283341	99/100	0.99
Otu01875_16	Otu0013118	98/100	0.98
Otu01876_16	Otu0000122	100/100	1
Otu01877_16	Otu0000041	100/100	1
Otu01878_16	Otu0251300	97/98	0.99
Otu01879_16	Otu0434516	92/100	0.92
Otu01880_16	Otu0002405	99/99	1
Otu01881_16	Otu0091925	96/98	0.98
Otu01882_16	Otu0020251	100/100	1
Otu01883_16	Otu0022927	99/100	0.99
Otu01884_16	Otu0034013	98/100	0.98
Otu01885_16	Otu0084941	97/98	0.99
Otu01886_16	Otu0000797	99/100	0.99
Otu01887_16	Otu0327202	97/98	0.99
Otu01888_16	Otu0283341	99/100	0.99
Otu01889_16	Otu0019708	100/100	1
Otu01890_16	Otu0076625	99/100	0.99
Otu01891_16	Otu0018578	99/100	0.99
Otu01892_16	Otu0190751	99/100	0.99
Otu01893_16	Otu0359997	98/100	0.98
Otu01894_16	Otu0444513	96/100	0.96
Otu01895_16	Otu0005951	100/100	1
Otu01896_16	Otu0020251	100/100	1
Otu01897_16	Otu0127466	99/100	0.99
Otu01898_16	Otu0000797	100/100	1
Otu01899_16	Otu0407322	97/100	0.97
Otu01900_16	Otu0000122	100/100	1
Otu01901_16	Otu0377869	98/100	0.98
Otu01902_16	Otu0000122	100/100	1
Otu01903_16	Otu0016511	99/100	0.99
Otu01904_16	Otu0359997	98/100	0.98
Otu01905_16	Otu0009725	98/98	1
Otu01906_16	Otu0039630	100/100	1
Otu01907_16	Otu0432358	91/93	0.98
Otu01908_16	Otu0007983	100/100	1
Otu01909_16	Otu0081136	98/100	0.98
Otu01910_16	Otu0242573	98/99	0.99
Otu01911_16	Otu0158893	95/100	0.95
Otu01912_16	Otu0291846	98/100	0.98
Otu01913_16	Otu0236777	99/100	0.99
Otu01914_16	Otu0446787	96/97	0.99
Otu01915_16	Otu0007983	99/100	0.99
Otu01917_16	Otu0283341	99/100	0.99
Otu01918_16	Otu0283341	99/100	0.99
Otu01919_16	Otu0000122	100/100	1
Otu01920_16	Otu0134014	99/100	0.99
Otu01921_16	Otu0006543	99/100	0.99
Otu01922_16	Otu0285967	99/100	0.99
Otu01923_16	Otu0258593	87/96	0.91
Otu01924_16	Otu0000122	100/100	1
Otu01925_16	Otu0127466	99/100	0.99
Otu01926_16	Otu0196535	97/100	0.97
Otu01927_16	Otu0242573	98/99	0.99
Otu01928_16	Otu0060863	99/100	0.99
Otu01929_16	Otu0013567	99/100	0.99
Otu01930_16	Otu0409132	97/98	0.99
Otu01931_16	Otu0222104	97/100	0.97
Otu01932_16	Otu0262215	98/100	0.98
Otu01933_16	Otu0223444	98/99	0.99
Otu01934_16	Otu0340792	98/100	0.98
Otu01935_15	Otu0459170	93/99	0.94
Otu01936_15	Otu0216222	94/97	0.97
Otu01937_15	Otu0021895	100/100	1
Otu01938_15	Otu0453046	89/97	0.92
Otu01939_15	Otu0160573	96/100	0.96
Otu01940_15	Otu0168643	98/100	0.98
Otu01941_15	Otu0013567	99/100	0.99
Otu01942_15	Otu0377869	98/100	0.98
Otu01943_15	Otu0127466	99/100	0.99
Otu01944_15	Otu0000797	100/100	1
Otu01945_15	Otu0168643	99/100	0.99
Otu01946_15	Otu0003868	100/100	1
Otu01947_15	Otu0176831	95/97	0.98
Otu01948_15	Otu0356583	94/99	0.95
Otu01949_15	Otu0075951	99/100	0.99
Otu01950_15	Otu0025921	99/99	1
Otu01951_15	Otu0199475	99/100	0.99
Otu01953_15	Otu0000005	100/100	1
Otu01954_15	Otu0036960	99/100	0.99
Otu01955_15	Otu0236819	99/100	0.99
Otu01956_15	Otu0128819	97/100	0.97
Otu01957_15	Otu0018578	99/100	0.99
Otu01958_15	Otu0270978	97/100	0.97
Otu01959_15	Otu0176831	96/97	0.99
Otu01960_15	Otu0291370	96/99	0.97
Otu01961_15	Otu0169418	97/100	0.97
Otu01962_15	Otu0162629	99/100	0.99
Otu01963_15	Otu0441990	97/97	1
Otu01964_15	Otu0000285	100/100	1
Otu01965_15	Otu0013567	99/100	0.99
Otu01966_15	Otu0189608	84/98	0.86
Otu01967_15	Otu0000041	100/100	1
Otu01968_15	Otu0251300	97/98	0.99
Otu01969_15	Otu0242573	98/99	0.99
Otu01970_15	Otu0201677	99/100	0.99
Otu01971_15	Otu0000041	100/100	1
Otu01972_15	Otu0146323	99/100	0.99
Otu01973_15	Otu0102814	99/100	0.99
Otu01974_15	Otu0340935	94/100	0.94
Otu01975_15	Otu0196535	97/100	0.97
Otu01976_15	Otu0000481	100/100	1
Otu01978_15	Otu0511331	97/100	0.97
Otu01979_15	Otu0110988	93/97	0.96
Otu01980_15	Otu0168643	98/100	0.98
Otu01981_15	Otu0359997	98/100	0.98
Otu01982_15	Otu0018578	99/100	0.99
Otu01983_15	Otu0091999	99/100	0.99
Otu01984_15	Otu0201677	99/100	0.99
Otu01985_15	Otu0013567	99/100	0.99
Otu01986_15	Otu0007983	100/100	1
Otu01987_15	Otu0270978	98/100	0.98
Otu01988_15	Otu0097814	97/97	1
Otu01989_15	Otu0121594	99/100	0.99
Otu01990_15	Otu0199475	99/100	0.99
Otu01991_15	Otu0000881	97/99	0.98
Otu01992_15	Otu0280349	99/100	0.99
Otu01993_15	Otu0188289	99/100	0.99
Otu01994_15	Otu0240308	97/97	1
Otu01995_15	Otu0137996	94/97	0.97
Otu01996_15	Otu0412866	98/100	0.98
Otu01997_15	Otu0011335	96/100	0.96
Otu01998_15	Otu0000615	98/98	1
Otu01999_15	Otu0000481	100/100	1
Otu02000_15	Otu0313672	93/97	0.96
Otu02001_15	Otu0018578	99/100	0.99
Otu02002_15	Otu0340792	98/100	0.98
Otu02003_15	Otu0340792	98/100	0.98
Otu02004_15	Otu0004035	100/100	1
Otu02005_15	Otu0268075	97/100	0.97
Otu02006_15	Otu0074482	96/100	0.96
Otu02007_15	Otu0110356	99/100	0.99
[truncated: 9,190 more rows]
